1 **Structures of potent and convergent neutralizing antibodies bound to the SARS-CoV-2 spike unveil a**  
2 **unique epitope responsible for exceptional potency**

3  
4 Shuo Du<sup>1,7</sup>, Yunlong Cao<sup>2,7</sup>, Qinyu Zhu<sup>1,7</sup>, Guopeng Wang<sup>1</sup>, Xiaoxia Du<sup>1,2</sup>, Runsheng He<sup>2</sup>, Hua Xu<sup>1</sup>, Yinghui  
5 Zheng<sup>2</sup>, Bo Wang<sup>1</sup>, Yali Bai<sup>2,3</sup>, Chenggong Ji<sup>1</sup>, Ayijiang Yisimayi<sup>1,2</sup>, Qisheng Wang<sup>4</sup>, Ning Gao<sup>1,3,5</sup>, X.  
6 Sunney Xie<sup>1,2,3\*</sup>, Xiao-dong Su<sup>1,2,6\*</sup>, Junyu Xiao<sup>1,3,6,8\*</sup>

7  
8 <sup>1</sup>School of Life Sciences, Peking University, Beijing 100871, China

9 <sup>2</sup>Beijing Advanced Innovation Center for Genomics (ICG) & Biomedical Pioneering Innovation Center  
10 (BIOPIC), Peking University, Beijing 100871, China

11 <sup>3</sup>Peking-Tsinghua Center for Life Sciences, Peking University, Beijing, China, 100871

12 <sup>4</sup>Shanghai Synchrotron Radiation Facility, Shanghai Advanced Research Institute, Chinese Academy of  
13 Sciences, Shanghai 201204, China

14 <sup>5</sup>State Key Laboratory of Membrane Biology, Peking University, Beijing, China, 100871

15 <sup>6</sup>State Key Laboratory of Protein and Plant Gene Research, Peking University, Beijing 100871, China

16 <sup>7</sup>These authors contributed equally to this work

17 <sup>8</sup>Lead Contact

18  
19 \*Correspondence and requests for materials should be addressed to [sunneyxie@pku.edu.cn](mailto:sunneyxie@pku.edu.cn) (X.S.X.),  
20 [xdsu@pku.edu.cn](mailto:xdsu@pku.edu.cn) (X.D.S), [junyuxiao@pku.edu.cn](mailto:junyuxiao@pku.edu.cn) (J.X.)

21

## 22 **Summary**

23

24 Understanding the mechanism of neutralizing antibodies (NAbs) against SARS-CoV-2 is critical for effective  
25 vaccines and therapeutics development. We recently reported an exceptionally potent NAb, BD-368-2, and  
26 revealed the existence of *VH3-53/VH3-66* convergent NAbs in COVID-19. Here we report the 3.5-Å cryo-EM  
27 structure of BD-368-2's Fabs in complex with a mutation-induced prefusion-state-stabilized spike trimer.  
28 Unlike *VH3-53/VH3-66* NAbs, BD-368-2 fully blocks ACE2 binding by occupying all three receptor-binding  
29 domains (RBDs) simultaneously, regardless of their "up" and "down" positions. BD-368-2 also triggers  
30 fusogenic-like structural rearrangements of the spike trimer, which could impede viral entry. Moreover, BD-  
31 368-2 completely avoids the common epitope of *VH3-53/VH3-66* NAbs, evidenced by multiple crystal  
32 structures of their Fabs in tripartite complexes with RBD, suggesting a new way of pairing potent NAbs to  
33 prevent neutralization escape. Together, these results rationalize a unique epitope that leads to exceptional  
34 neutralization potency, and provide guidance for NAb therapeutics and vaccine designs against SARS-CoV-2.  
35

## 36 Introduction

37

38 Coronavirus disease 2019 (COVID-19), caused by the severe acute respiratory syndrome coronavirus 2  
39 (SARS-CoV-2), has become a global pandemic (Callaway et al., 2020). An important structural protein of  
40 SARS-CoV-2 is the Spike (S) protein, which recognizes human angiotensin-converting enzyme 2 (ACE2) to  
41 mediate the fusion between viral and host cell membranes (Hoffmann et al., 2020; Walls et al., 2020). The S  
42 protein could be divided into two regions, S1 and S2. S1 contains the N-terminal domain (NTD), which likely  
43 contributes to maintaining the prefusion state of the S protein, and the receptor-binding domain (RBD), which  
44 is responsible for interacting with ACE2 (Lan et al., 2020; Shang et al., 2020; Wang et al., 2020b; Xu et al.,  
45 2020; Yan et al., 2020; Zhou et al., 2020b). Binding of ACE2 to RBD induces a conformational change in the  
46 S protein, leading to the exposure of the membrane fusion peptide in S2 that subsequently functions in the  
47 membrane fusion process. Structural analyses of the S trimer reveals that RBDs could adopt different “up” and  
48 “down” conformations (Ke et al., 2020; Walls et al., 2020; Wrapp et al., 2020), which has important  
49 implications in both receptor binding and immune recognition.

50

51 Neutralizing antibodies are important therapies for COVID-19. SARS-CoV-2 neutralizing antibodies (NAbs)  
52 targeting the RBD, as well as the NTD, were reported extensively (Barnes et al., 2020; Brouwer et al., 2020;  
53 Cao et al., 2020; Chi et al., 2020; Hansen et al., 2020; Ju et al., 2020; Liu et al., 2020; Pinto et al., 2020;  
54 Robbiani et al., 2020; Rogers et al., 2020; Seydoux et al., 2020; Shi et al., 2020; Wang et al., 2020a; Wec et  
55 al., 2020; Wu et al., 2020; Zhou et al., 2020a). Recently, we identified a series of potent neutralizing antibodies  
56 from convalescent patients using high-throughput single-cell RNA sequencing (Cao et al., 2020). The most  
57 potent one, BD-368-2, exhibited high therapeutic and prophylactic efficacy in hACE2-transgenic mice infected  
58 by SARS-CoV-2 (Bao et al., 2020). We also revealed the wide existence of a convergent, public, or stereotypic  
59 antibody response to SARS-CoV-2 by *VH3-53/VH3-66* derived NAbs, which was confirmed and highlighted  
60 in several recent studies (Barnes et al., 2020; Hansen et al., 2020; Kim et al., 2020; Robbiani et al., 2020;  
61 Rogers et al., 2020; Yuan et al., 2020a). The *VH3-53/VH3-66* convergent NAbs share highly conserved VDJ  
62 sequences and could be found in different individuals in distinct populations, similar to what has been observed  
63 in HIV, Influenza, and Hepatitis C viruses (Ekiert et al., 2009; Gorny et al., 2009; Marasca et al., 2001).

64

65 Since BD-368-2 and several *VH3-53/VH3-66* NAbs, such as CB6 (Shi et al., 2020), are now undergoing  
66 clinical evaluations, it is critical to understand their detailed interactions with the S protein and the molecular  
67 mechanisms behind their high neutralizing potency. On the other hand, gaining further insights into the  
68 interactions between these NAbs and the S protein could also facilitate the design of S protein variants that are  
69 stabilized at particular conformations to be used as vaccines, as demonstrated by the success of structure-based  
70 vaccine design for the respiratory syncytial virus (Crank et al., 2019; Graham et al., 2019). Here we conducted  
71 a systematic structural analysis of the antibody response to the S protein. We obtained a large collection  
72 of *VH3-53/VH3-66* and *JH4/JH6* derived antibodies and showed that a high proportion of these antibodies are  
73 potent SARS-CoV-2 NAbs. Multiple high-resolution crystal structures of the RBD in complex with the Fabs  
74 of these NAbs revealed that the convergent NAbs all share a highly conserved epitope that is only accessible  
75 in the “up” RBDs.

76

77 We also investigated BD-368-2’s neutralizing mechanism and its molecular interaction with the S protein.  
78 With the help of a mutation-induced prefusion-state-stabilized S trimer, we determined the 3.5-Å cryo-EM  
79 structure of BD-368-2 Fabs in complex with the S trimer and showed that BD-368-2 fully blocks ACE2 binding

80 by occupying all three RBDs simultaneously regardless of their “up” and “down” positions. Furthermore, the  
81 tripartite crystal structures of RBD in complex with the Fabs of both BD-368-2 and *VH3-53/VH3-66* NAbs  
82 demonstrated that their epitopes are entirely non-overlapping. These results rationalize the potent neutralizing  
83 mechanism of BD-368-2 and suggest the ideal therapeutic application of BD-368-2 in pair with the *VH3-  
84 53/VH3-66* NAbs to prevent neutralization escape caused by mutation of the S protein.

85

## 86 **Results**

87

### 88 ***VH3-53/VH3-66* derived convergent antibodies exhibit high neutralizing potency**

89 Previously, we reported a phenomenon of a stereotypic/convergent antibody response to SARS-CoV-2.  
90 Those convergent antibodies were derived from the *VH3-53/VH3-66* family and showed a high likelihood of  
91 being SARS-CoV-2 NAbs. Multiple groups have reported similar NAbs, such as CB6, demonstrating their  
92 wide existence in distinct populations. More importantly, the NAbs generated by different individuals not  
93 only share highly similar  $V_H$  gene segments, but also exhibit conserved sequences for both  $J_H$  and  $V_L$  gene  
94 segments. To gain more insights into the convergent NAbs, we synthesized 28 additional *VH3-53/VH3-66*  
95 derived antibodies from the RBD-enriched high-throughput single-cell sequencing library (Cao et al., 2020).  
96 All antibodies were selected based on their variable (V), diversity (D), and joining (J) combinations, which  
97 contain a *VH3-53/VH3-66*  $V_H$  gene, a *JH4/JH6*  $J_H$  gene, and a *VK1-9/VK1D-33/VK1D-39/VK3-20*  $V_L$  gene.  
98 Combined with the previously reported antibodies, such as BD-236, a total of 45 *VH3-53/VH3-66* derived  
99 antibodies were collected (Table S1). Verified by a pseudovirus-based neutralization assay, we found that  
100 nearly two-thirds of the *VH3-53/VH3-66* antibodies displayed neutralizing abilities against SARS-CoV-2  
101 (Figure 1A). Also, seven new potent NAbs were discovered, all showing an  $IC_{50}$  below 20 ng/mL (Figure  
102 1B, Figure S1) and a high binding affinity for RBD (Figure S2). Together, our collection of *VH3-53/VH3-66*  
103 derived convergent NAbs showed clear evidence for the existence of a strong, recurrent antibody response to  
104 SARS-CoV-2.

105

### 106 **Crystal structures of *VH3-53/VH3-66* antibodies in complex with RBD**

107 To characterize the molecular interactions between the *VH3-53/VH3-66* NAbs and RBD, we determined the  
108 crystal structures of RBD in complex with the antigen-binding fragment (Fabs) of BD-236, BD-604, and  
109 BD-629 at 2.4 Å, 3.2 Å, and 2.7 Å, respectively (Table S2). These Fabs bind to the RBD with almost  
110 identical poses and impose very similar footprints on RBD (Figure 2). Furthermore, they bind to the RBD in  
111 similar fashions as B38 (Figure 2D), a *VH3-53* antibody (Wu et al., 2020); and CB6 (Figure 2E), a *VH3-66*  
112 antibody (Shi et al., 2020). The structures of several other *VH3-53/VH3-66* mAbs have also been recently  
113 reported, including C105 (Barnes et al., 2020), CC12.1 and CC12.3 (Yuan et al., 2020a), and CV30  
114 (Hurlburt et al., 2020). They all appear to interact with RBD in very similar manners (Figure S3). The  
115 abundant presence of the *VH3-53/VH3-66* NAbs in patients, and the fact that these antibodies target a  
116 commonly shared epitope on the RBD, suggesting that this region of the S protein is highly effective in  
117 eliciting immune responses.

118

119 BD-236, BD-604, and BD-629 all interact with the RBD using their three heavy chain CDRs (CDRH1-3)  
120 and two light chain CDRs (CDRL1, CDRL3) (Figure 2F-H). Differences in these regions, especially the  
121 heavy chain CDRs, account for their different binding affinities to RBD. For example, BD-236 and BD-604  
122 are highly similar to each other. Their immunoglobulin heavy chain variable (V), and joining (J) regions are  
123 both encoded by germline genes *IGHV3-53* and *IGHJ6*. Their light chains are derived from the same V

124 region (*IGKV1-9*) as well, and differ only in the J regions (*IGKJ4* for BD-236, whereas *IGKJ2* for BD-604).  
125 Only four and two amino acids are different in their respective CDRHs and CDRLs that are involved in  
126 interacting with RBD. Nevertheless, BD-604 binds to RBD with a  $K_d$  of 0.15 nM, ~19 fold higher than BD-  
127 236, which displays a  $K_d$  of 2.8 nM (Table S1). BD-604 is also more potent against the SARS-CoV-2  
128 pseudovirus, with an  $IC_{50}$  value of 5 ng/ml, compared to 37 ng/ml for BD-236. Detailed structural analyses  
129 reveal that two critical aromatic residues in the CDRH2 and CDRH3 of BD-604 likely contribute to its  
130 higher affinity interaction with RBD (Figure S4A). First, Phe58 in CDRH2 replaces Asp58 in BD-236,  
131 leading to a better packing with Tyr52 and also van der Waals interactions with Thr415<sup>S</sup>-Gly416<sup>S</sup>  
132 (superscript S indicates the amino acid of the S protein) (Figure S4B). Second, Tyr102 in CDRH3 substitutes  
133 for Ala102 in BD-236, and it interacts with Gln493<sup>S</sup> via a hydrogen bond (Figure S4C). In contrast, even  
134 though the heavy chain and light chain genes encoding BD-629 are more different when compared to BD-  
135 604 except for *IGHV3-53*, its RBD binding affinity and neutralization ability are similar to BD-604 (Figure  
136 1B, Table S1). Aromatic residues corresponding to Phe58 and Tyr102 in BD-604 are both present in BD-  
137 629. In CDRH2, Tyr58 not only mediates packing interactions as described above for Phe58 in BD-604 but  
138 also forms hydrogen bonds with Thr415<sup>S</sup> (Figure S4B). In CDRH3, Tyr102 is present, together with two  
139 additional tyrosine residues, Tyr99 and Tyr103 (Figure S4A). Tyr102 is slightly pushed away by Tyr103 to  
140 form a hydrogen bond with Tyr453<sup>S</sup>; whereas Tyr99 and Tyr103 mediate packing interactions with Phe456<sup>S</sup>  
141 and Tyr489<sup>S</sup> (Figure S4C). As a result of these additional interactions, the binding between BD-629 and  
142 RBD is more dominated by the heavy chain when compared to BD-604. The VH and VL domains of BD-  
143 629 bury 809 and 198 Å<sup>2</sup> surface areas on RBD, respectively, compared to 754 and 367 Å<sup>2</sup> for BD-604.

#### 144 145 ***VH3-53/VH3-66* antibodies engage the RBDs in the “up” conformation**

146 Importantly, once these antibodies engage the RBD, they would all block ACE2 from binding (Figure 3A),  
147 explaining their potent neutralizing activities. When their interaction with RBD is considered in the context  
148 of the S trimer, it is evident that these antibodies could only engage the RBDs in the “up” conformation  
149 (Figure 3B). Once an RBD is in the “down” position, the attachment of these antibodies would be sterically  
150 hindered by an adjacent protomer (Figure 3C). The S trimer has a dynamic nature and can exist in multiple  
151 conformations, with the predominant conformations being either close, which has all three RBDs “down”, or  
152 partially open, which has one RBD “up” (Ke et al., 2020; Walls et al., 2020; Wrapp et al., 2020). Both of  
153 these states would create some conformation barriers for the *VH3-53/VH3-66* NAbs to engage all three  
154 RBDs simultaneously, since they would have to seize the stochastic opening moment of the S trimer to  
155 snatch the “down” RBDs.

#### 156 157 **BD-368-2’s epitope does not overlap with convergent antibodies’ binding site**

158 Among the neutralizing antibodies we identified, BD-368-2 is the most potent, exhibiting an  $IC_{50}$  of 1.2 and  
159 15 ng/mL against pseudo and authentic SARS-CoV-2 (Cao et al., 2020). BD-368-2 also showed high  
160 therapeutic and prophylactic efficacy in SARS-CoV-2-infected mice. The immunoglobulin heavy chain is  
161 encoded by germline genes *IGHV3-23*, *IGHD3-16*, and *IGHJ4*, respectively; whereas the light chain is  
162 encoded by *IGKV2-28* and *IGKJ5*. To characterize the molecular interactions between BD-368-2 and RBD,  
163 we first attempted to obtain the crystal structure of BD-368-2 Fab in complex with RBD. However, this  
164 endeavor was unsuccessful despite extensive trials. We then discovered that BD-368-2 Fab could bind to  
165 RBD together with the Fabs of several *VH3-53/VH3-66* antibodies. We subsequently determined the crystal  
166 structures of three tripartite complexes consisting of the Fabs of these antibodies and RBD: BD-

167 236/RBD/BD-368-2, BD-604/RBD/BD-368-2, and BD-629/RBD/BD-368-2. The resolutions are 3.4 Å, 2.7  
168 Å, and 2.7 Å, respectively (Table S2).

169  
170 These tripartite complexes display Y-like shapes, with the BD-368-2 Fab and *VH3-53/VH3-66* Fab attacking  
171 the RBD from opposite sides (Figure 4; Figure S5A-B). The interactions between the *VH3-53/VH3-66* Fabs  
172 and RBD are highly similar to those seen in the binary complexes described above (Figure S5C-E). Five  
173 regions in the BD-368-2 Fab are involved in interacting with RBD: heavy chain CDRH1 and CDRH3, DE  
174 loop in the VH domain, and light chain CDRL1 and CDRL2 (Figure 5A). The remaining two CDRs,  
175 especially CDRH2, do not directly contact RBD, suggesting that the interaction between BD-368-2 and RBD  
176 could be further enhanced by structure-based protein engineering. Gly26, Phe27, and Ala28 in CDRH1  
177 cradle Tyr449<sup>S</sup> (Figure 5B). Tyr32 in CDRH1 and Arg102 in CDRH3 together form robust packing with  
178 Phe490<sup>S</sup>. Arg102 also attaches to Glu484<sup>S</sup> via a bidentate interaction. In addition, several hydrogen bonds are  
179 present between the heavy chain CDRs and RBD, involving heavy chain residues Arg100, Tyr105, Asp106,  
180 and RBD residues Gly482<sup>S</sup>, Glu484<sup>S</sup> (Figure 5B). Ser75 and Asn77 in the DE loop of the VH domain form  
181 hydrogen bonds with Arg346<sup>S</sup> and Asn450<sup>S</sup> (Figure 5C). The light chain of BD-368-2 Fab mainly plays a  
182 supportive role in stabilizing the conformation of the heavy chain residues. Direct interactions between the  
183 light chain and RBD are seen between Asn33 in CDRL1 and Asn481<sup>S</sup>, which form reciprocal hydrogen  
184 bonds between their respective main chain and side chain groups (Figure 5D). Asn33, Tyr35, Tyr37, and  
185 Leu55 together create a pocket to accommodate Val483<sup>S</sup>.

186  
187 The epitope of BD-368-2 does not significantly overlap with the binding site of ACE2 on RBD.  
188 Nevertheless, a structural superimposition of the RBD/BD-368-2 and RBD/ACE2 complexes reveals a clash  
189 between the VL domain of BD-368-2 Fab and ACE2 (Figure 5E), consistent with our previous analyses that  
190 BD-368-2 competitively inhibits the interaction between RBD and ACE2 (Cao et al., 2020). Furthermore,  
191 ACE2 exists as a homodimer in vivo (Yan et al., 2020). The constant domains in the BD-368-2 Fab would  
192 significantly clash with the other ACE2 protomer in the ACE2 dimer as well. The presence of the Fc region  
193 in RBD-BD-368-2 IgG would cause even more pronounced steric obstruction. Thus, BD-368-2 can directly  
194 block the interaction between RBD and ACE2, thereby exerting a protective effect.

### 195 196 **Cryo-EM structure of BD-368-2 in complex with the prefusion-stabilized S trimer**

197 To further investigate the molecular mechanism by which BD-368-2 neutralizes SARS-CoV-2, we set to  
198 characterizing its interaction with the S trimer using cryo-EM. In the beginning, we used the 2P variant of  
199 the S protein (S-2P), which was designed by McLellan's group and contains two stabilizing proline  
200 substitutions at residues 986-987 (Wrapp et al., 2020). We have successfully used this mutant to determine  
201 the cryo-EM structure of the S trimer in complex with the Fab of BD-23 (Cao et al., 2020). However, BD-  
202 368-2 Fab promptly disrupted the prefusion state structure of S-2P (Figure 6A). This phenomenon is  
203 reminiscent of S230, an antibody isolated from a person infected by SARS-CoV, which can functionally  
204 mimic ACE2 and promote a fusogenic-like conformational rearrangement of SARS-CoV S (Walls et al.,  
205 2019).

206  
207 To this end, we produced S-HexaPro (S-6P), which was reported by the McLellan group recently (Hsieh et  
208 al., 2020). S-6P has a more stabilized prefusion state due to the introduction of four additional proline  
209 substitutions in the S2 segment of the S protein (F817P, A892P, A899P, A942P), which likely hinder the  
210 conformational change of S2. Indeed, S-6P is much more stable compared to S-2P in the presence of BD-

211 368-2 Fab (Figure 6A). We subsequently determined a cryo-EM structure of BD-368-2 Fab in complex with  
212 S-6P at an overall resolution of 3.5 Å (Figure S6, Table S3).

213  
214 S-6P exhibits an asymmetric conformation as previously observed (Cao et al., 2020; Wrapp et al., 2020),  
215 with one RBD “up” and two RBDs “down” (Figure 6B). All three RBDs are engaged by the BD-368-2 Fabs.  
216 Notably, one BD-368-2 Fab (BD-368-2-C, Figure 6C) that binds to one of the “down” RBD is spatially  
217 sandwiched between the NTD and RBD of the adjacent RBD-“up” protomer. The VH domain of this Fab is  
218 close to a glycan attached to Asn165 in the NTD of the RBD-“up” protomer, whereas the VL domain  
219 appears to contact the “up” RBD directly. In a way, it seems that besides its own RBD target, this Fab is also  
220 exploiting the adjacent S protomer to gain further avidity. Together, our structural analyses suggest that BD-  
221 368-2 can bind to the RBDs regardless of their “up” and “down” positions to achieve full occupancy of the S  
222 trimer. Consistently, BD-368-2 IgG exhibits markedly increased binding affinities for the S trimer compared  
223 to its Fab, likely because of the multivalent interactions (Figure 6D).

224

## 225 **Discussion**

226

227 Here we performed a systematic structural analysis of the SARS-CoV-2 NAbs. Our results shed light on their  
228 neutralizing mechanisms. Both *VH3-53/VH3-66* NAbs and BD-368-2 directly prevent RBD from binding to  
229 the human receptor ACE2, thus fending the cells off the viral particles. In contrast to the *VH3-53/VH3-66*  
230 antibodies that can only engage the “up” RBD, BD-368-2 is unique in the way that it can access its epitopes  
231 on the S protein regardless of the “up” and “down” positions of the RBDs. We further show that BD-368-2  
232 promptly disrupts the prefusion state of the S protein, which likely reflects a premature fusogenic-like  
233 structural rearrangement. This is highly evocative of the neutralizing mechanism proposed for S230 (Walls et  
234 al., 2019). A similar mechanism has been proposed recently for CR3022 (Huo et al., 2020), another  
235 neutralizing antibody isolated from a convalescent SARS patient that can cross-react with the S protein of  
236 SARS-CoV-2 (Tian et al., 2020; Yuan et al., 2020b).

237

238 We further show that the epitopes of the *VH3-53/VH3-66* NAbs and BD-368-2 have no overlaps, and can  
239 engage one RBD simultaneously. These results provide a foundation for combination therapy. In fact, BD-  
240 368-2 may further potentiate the activity of the *VH3-53/66* antibodies, since it can induce rapid structural  
241 changes of the S trimer, which may lead to the exposure of the RBDs that were originally in the “down”  
242 state. The simultaneous use of two antibodies targeting different epitopes of the S protein can not only  
243 potentially lead to more effective treatments, but also prevent the emerging of mutant viruses that escape  
244 from the neutralizing power of one antibody. Recently, scientists at Regeneron have described such a pair of  
245 antibodies, REGN10987 and REGN10933, and showed that their cocktail indeed prevented the generation of  
246 escaping mutants using a pseudovirus system (Baum et al., 2020; Hansen et al., 2020). Structural  
247 comparisons suggest that REGN10933 and the *VH3-53/VH3-66* antibodies such as BD-629 bind to a largely  
248 similar area on RBD, whereas REGN10987 and BD-368-2 each aims at a different region (Figure S7). BD-  
249 629 can bind to RBD together with REGN10987, whereas BD-368-2 would clash with both REGN10987  
250 and REGN10933 (Figure S7C) and therefore can’t function in a pair with any of them.

251

252 Besides the *VH3-53/VH3-66* antibodies, further structural analyses suggest that BD-368-2 appears to be able  
253 to bind RBD together with two other antibodies: CR3022 and S309 (Figure 7). Like CR3022, S309 was also  
254 originally isolated from a convalescent SARS patient and can neutralize SARS-CoV-2 (Pinto et al., 2020).

255 These antibodies each have a unique epitope and displays a distinct binding pose. Among them, BD-368-2  
256 binds to the RBD regardless of its “up” and “down” state, blocks the engagement of ACE2, and causes  
257 drastic conformational changes of the S trimer. All these effects likely contribute to its potent neutralizing  
258 activity. S309 recognizes a glycan-containing epitope and can also bind both the “up” and “down” RBDs  
259 (Pinto et al., 2020). Nevertheless, S309 does not directly compete with ACE2 for binding to the S protein,  
260 and likely has a different mechanism of neutralization. The *VH3-53/VH3-66* antibodies engage the “up”  
261 RBDs to prevent their interaction with ACE2. CR3022 recognizes an epitope that is inaccessible in the  
262 prefusion state of the S protein, and have to engage the RBDs when at least two RBDs are “up” and also  
263 rotated (Huo et al., 2020; Yuan et al., 2020b). Certainly, the SARS-CoV-2 S protein is flexible in nature and  
264 exists in multiple conformations, and the presence of some of these antibodies can change the conformation  
265 landscape and trigger conformational changes, as shown for BD-368-2 (Figure 6A) and CR3022 (Huo et al.,  
266 2020). Collectively, these very different and non-overlapping antibodies provide an arsenal of therapeutic  
267 choices, and multiple combinations between them, even with antibodies that target the NTD of the S protein  
268 (Chi et al., 2020; Liu et al., 2020), can be tested to intervene the SARS-CoV-2 pandemic.  
269



270 **KEY RESOURCES TABLE**

| REAGENT or RESOURCE                                                                        | SOURCE                   | IDENTIFIER         |
|--------------------------------------------------------------------------------------------|--------------------------|--------------------|
| <b>Antibodies</b>                                                                          |                          |                    |
| Goat anti-human IgG (H+L)/HRP                                                              | JACKSON                  | Cat#109-035-088    |
| Anti-His/HRP                                                                               | ThermoFisher             | Cat#MA1-21315      |
| <b>Bacterial and Virus Strains</b>                                                         |                          |                    |
| DH10Bac E. coli                                                                            | Invitrogen               | Cat#10359-016      |
| SARS-COV-2 VSV pseudotyped virus                                                           | NIFDC (Nie et al., 2020) | N/A                |
| <b>Chemicals, Peptides, and Recombinant Proteins</b>                                       |                          |                    |
| X-tremeGENE 9 DNA Transfection Reagent                                                     | Roche                    | Cat#19129300       |
| Polyethylenimine                                                                           | Polysciences             | Cat#23966-2        |
| SARS-COV-2 RBD protein, His-tag                                                            | Sino Biological Inc.     | Cat#40592-V08B     |
| SARS-COV-2 spike protein, His-tag                                                          | Sino Biological Inc.     | Cat#40589-V08B1    |
| Biotinylated SARS-COV-2 RBD protein                                                        | Sino Biological Inc.     | Cat#40592-V08B-B   |
| DMEM                                                                                       | ThermoFisher             | Cat#11965092       |
| HEPES (1 M)                                                                                | ThermoFisher             | Cat#15630080       |
| Papain                                                                                     | Sangon Biotech           | Cat#A501612        |
| Iodoacetamide                                                                              | Sigma Aldrich            | Cat#I1149          |
| SMM 293-TI medium                                                                          | Sino Biological Inc.     | Cat#M293TI         |
| SIM SF medium                                                                              | Sino Biological Inc.     | Cat#MSF1           |
| SIM HF medium                                                                              | Sino Biological Inc.     | Cat#MHF1           |
| <b>Critical Commercial Assays</b>                                                          |                          |                    |
| Ni Sepharose 6 Fast Flow                                                                   | GE healthcare            | Cat#17531803       |
| Superdex 200 Increase 10/300 GL                                                            | GE healthcare            | Cat#28990944       |
| Superose 6 Increase 10/300 GL                                                              | GE healthcare            | Cat#29091596       |
| SA sensor chip                                                                             | GE Healthcare            | Cat#29104992       |
| Spike Protein ELISA kit                                                                    | Sino Biological Inc.     | Cat#KIT40591       |
| Protein A High Performance                                                                 | GE healthcare            | Cat#17040201       |
| <b>Deposited Data</b>                                                                      |                          |                    |
| Crystal structure of the SARS-CoV-2 S RBD in complex with BD-236 Fab                       | This study               | PDB ID: 7CHB       |
| Crystal structure of the SARS-CoV-2 S RBD in complex with BD-604 Fab                       | This study               | PDB ID: 7CH4       |
| Crystal structure of the SARS-CoV-2 S RBD in complex with BD-629 Fab                       | This study               | PDB ID: 7CH5       |
| Crystal structure of the SARS-CoV-2 S RBD in complex with BD-236 Fab and BD-368-2 Fab      | This study               | PDB ID: 7CHE       |
| Crystal structure of the SARS-CoV-2 S RBD in complex with BD-604 Fab and BD-368-2 Fab      | This study               | PDB ID: 7CHF       |
| Crystal structure of the SARS-CoV-2 S RBD in complex with BD-629 Fab and BD-368-2 Fab      | This study               | PDB ID: 7CHC       |
| Cryo-EM structure of the SARS-CoV-2 S-6P in complex with three BD-368-2 Fabs               | This study               | PDB ID: 7CHH       |
| Electron microscopy density map of the SARS-CoV-2 S-6P in complex with three BD-368-2 Fabs | This study               | EMDB ID: EMD-30374 |
| <b>Experimental Models: Cell Lines</b>                                                     |                          |                    |
| HEK293F cells                                                                              | ThermoFisher             | Cat#11625019       |
| Huh7 cells                                                                                 | NIFDC (Nie et al., 2020) | N/A                |
| Sf21 cells                                                                                 | Invitrogen               | Cat#B821-01        |
| High Five cells                                                                            | Invitrogen               | Cat#B855-02        |

| Recombinant DNA                                                                                                    |                         |                                                                                                                       |
|--------------------------------------------------------------------------------------------------------------------|-------------------------|-----------------------------------------------------------------------------------------------------------------------|
| SARS-CoV-2 S gene, residues 1-1208, 2P and furin cleavage mutation, T4 fibrin trimerization motif, 8xHisTag, pcDNA | Cao et al., 2020        | N/A                                                                                                                   |
| SARS-CoV-2 S gene, residues 1-1208, 6P and furin cleavage mutation, T4 fibrin trimerization motif, 8xHisTag, pcDNA | This study              | N/A                                                                                                                   |
| SARS-CoV-2 S RBD, residues 319-541, pFastBac                                                                       | This study              | N/A                                                                                                                   |
| BD-236 Fab, heavy chain, 6xHisTag, pcDNA                                                                           | This study              | N/A                                                                                                                   |
| BD-236 Fab, light chain, pcDNA                                                                                     | This study              | N/A                                                                                                                   |
| BD-604 Fab, heavy chain, 6xHisTag, pcDNA                                                                           | This study              | N/A                                                                                                                   |
| BD-604 Fab, light chain, pcDNA                                                                                     | This study              | N/A                                                                                                                   |
| BD-629 Fab, heavy chain, 6xHisTag, pcDNA                                                                           | This study              | N/A                                                                                                                   |
| BD-629 Fab, light chain, pcDNA                                                                                     | This study              | N/A                                                                                                                   |
| BD-368-2 IgG, heavy chain, pcDNA                                                                                   | This study              | N/A                                                                                                                   |
| BD-368-2 IgG, light chain, pcDNA                                                                                   | This study              | N/A                                                                                                                   |
| Software and Algorithms                                                                                            |                         |                                                                                                                       |
| HKL2000                                                                                                            | HKL Research            | <a href="http://www.hkl-xray.com/">http://www.hkl-xray.com/</a>                                                       |
| PHENIX                                                                                                             | Liebschner et al., 2019 | <a href="https://www.phenix-online.org/">https://www.phenix-online.org/</a>                                           |
| COOT                                                                                                               | Emsley et al., 2010     | <a href="http://www2.mrc-lmb.cam.ac.uk/Personal/pemsley/coot">http://www2.mrc-lmb.cam.ac.uk/Personal/pemsley/coot</a> |
| Pymol                                                                                                              | Schrödinger, LLC.       | <a href="http://www.pymol.org">http://www.pymol.org</a>                                                               |
| SerialEM software                                                                                                  | Mastrorade, 2005        | <a href="http://bio3d.colorado.edu/SerialEM">http://bio3d.colorado.edu/SerialEM</a>                                   |
| MotionCor2                                                                                                         | Zheng et al., 2017      | <a href="https://emcore.ucsf.edu/ucsf-motioncor2">https://emcore.ucsf.edu/ucsf-motioncor2</a>                         |
| Gctf program (v1.06)                                                                                               | Zhang, K., 2016         | <a href="https://www.mrc-lmb.cam.ac.uk/kzhang/Gctf">https://www.mrc-lmb.cam.ac.uk/kzhang/Gctf</a>                     |
| RELION (v3.07)                                                                                                     | Zivanov et al., 2018    | <a href="http://www2.mrc-lmb.cam.ac.uk/reliion">http://www2.mrc-lmb.cam.ac.uk/reliion</a>                             |
| ResMap                                                                                                             | Kucukelbir et al., 2014 | <a href="http://resmap.sourceforge.net">http://resmap.sourceforge.net</a>                                             |
| UCSF Chimera                                                                                                       | Pettersen et al., 2004  | <a href="https://www.cgl.ucsf.edu/chimera">https://www.cgl.ucsf.edu/chimera</a>                                       |

271

272

## RESOURCE AVAILABILITY

273

### Lead Contact

275

Further information and requests for resources and reagents should be directed to and will be fulfilled by the

276

Lead Contact, Junyu Xiao [junyuxiao@pku.edu.cn](mailto:junyuxiao@pku.edu.cn) (J.X.)

277

278

### Material Availability

279 There are restrictions on the availability of antibodies due to limited stock and continued consumption. We  
280 are glad to share remaining antibodies with reasonable compensation for processing and shipping upon  
281 completion of a Material/Data Transfer Agreement for non-commercial usage.

282

### 283 **Data and Code Availability**

284 Human antibody sequences are available on the European Genome-Phenome Archive upon publication.  
285 Material/Data Transfer Agreements, which allow the use of the antibody sequences for non-commercial  
286 purposes but not their disclosure to third parties, are needed to obtain the sequences by contacting the Data  
287 Access Committee.

288

### 289 **STAR Methods**

290

#### 291 ***In Vitro* expression of the antibodies and ELISA quantification**

292 All antibody sequences in this manuscript were generated in the previous study (Cao et al., 2020). The  
293 antibodies were *in vitro* expressed using HEK293 cells, and the binding specificities were quantified by ELISA  
294 against the Spike protein and the RBD protein, as described previously. An antibody is defined as ELISA-  
295 positive when the OD<sub>450</sub> is saturated using 1 µg/mL RBD/S protein.

296

#### 297 **Surface plasmon resonance**

298 The dissociation coefficients for the binding between BD-368-2 and the S trimers were measured using a  
299 Biacore T200 (GE Healthcare) as previously described (Cao et al., 2020). Anti-His-tag antibodies were  
300 loaded to a SA sensor chip by NHS to capture the His-tag labeled S trimer. Serial dilutions of purified BD-  
301 368-2 Fab or IgG were then injected, ranging in concentrations from 50 to 0.78 nM. The running buffer is  
302 phosphate buffered saline, pH 7.4, supplemented with 0.005% (v/v) P20. The resulting data were fit to a 1:1  
303 binding model using the Biacore Evaluation Software.

304

#### 305 **Measurement of antibody neutralization potency**

306 The pseudovirus neutralization assays were performed using Huh-7 cell lines, as described previously (Cao  
307 et al., 2020). Briefly, various concentrations of antibodies (3-fold serial dilution using DMEM) were mixed  
308 with the same volume of SARS-CoV-2 pseudovirus in a 96 well-plate. The mixture was incubated for 1 h at  
309 37 °C and supplied with 5% CO<sub>2</sub>. Pre-mixed Huh-7 cells were added to all wells and incubated for 24 h at  
310 37 °C and supplied with 5% CO<sub>2</sub>. After incubation, the supernatants were removed, and D-luciferin reagent  
311 (Invitrogen) was added to each well and measured luciferase activity using a microplate spectrophotometer  
312 (Perkinelmer EnSight). The inhibition rate is calculated by comparing the OD value to the negative and  
313 positive control wells. IC<sub>50</sub> and IC<sub>80</sub> were determined by a four-parameter logistic regression using GraphPad  
314 Prism 8.0 (GraphPad Software Inc.).

315

#### 316 **Protein expression and purification**

317 The SARS-CoV-2 RBD (residues 319-541) with an N-terminal His<sub>6</sub> tag was cloned into a modified pFastBac  
318 vector (Invitrogen) that encodes a gp67 signal peptide. Bacmids were generated using the Bac-to-Bac system  
319 (Invitrogen). Baculoviruses were generated and amplified using the Sf21 insect cells. For protein production,  
320 Hi5 insect cells at 1.5 million cells/mL were infected with the RBD baculovirus. The conditioned media  
321 were harvested after 48 h, concentrated using a Hydrosart Ultrafilter, and exchanged into the binding buffer  
322 (25 mM Tris-HCl, pH 8.0, 200 mM NaCl). The RBD protein was purified first using the Ni-NTA resin (GE

323 Life Sciences) and then a Superdex 200 Increase 10/300 gel filtration column (GE Life Sciences). The final  
324 buffer used for the gel filtration step contains 20 mM HEPES, pH 7.2, and 150 mM NaCl.

325

326 The Fabs of BD-236, BD-604, and BD-629 were obtained by transient transfection in HEK293F cells using  
327 polyethylenimine (Polysciences) when the cell density reached 1 million cells/mL. A C-terminal His<sub>6</sub> tag  
328 was added to the heavy chains. Four days after transfection, the conditioned media were collected, and the  
329 Fabs were purified using the Ni-NTA resin and Superdex 200 Increase column similarly as the RBD. BD-  
330 368-2 IgG was expressed by transient transfection in HEK293F cells and purified from the conditioned  
331 media using a Protein A column (GE Life Sciences). To obtain the BD-368-2 Fab, BD-368-2 IgG (2 mg/mL)  
332 was digested with papain (0.1 mg/mL) for 2 hours at 37 °C, in a buffer containing 50 mM phosphate buffer  
333 saline, pH 7.0, 2 mM EDTA, and 5.5 mM cysteine. Digestion was quenched using 30 mM iodoacetamide at  
334 30 °C for 30 min. The Fc region was removed by protein A chromatography, and the BD-368-2 Fab was  
335 further purified using the Superdex 200 Increase column and eluted using the final buffer.

336

337 The S-2P expression construct was previously described (Cao et al., 2020). The S-6P construct (Hsieh et al.,  
338 2020) was generated from S-2P using a PCR based method. The S-2P or S-6P plasmid was transfected into  
339 the HEK293F cells when the cell density reached 1 million cells/mL and expressed for four days. The S  
340 proteins were purified using the Ni-NTA resin, followed by a Superose 6 Increase 10/300 gel filtration  
341 column (GE Life Sciences), and eluted using the final buffer.

342

#### 343 **Crystallization and structure determination**

344 The BD-236/RBD, BD-604/RBD, BD-629/RBD, BD-236/RBD/BD-368-2, BD-604/RBD/BD-368-2, and  
345 BD-629/RBD/BD-368-2 complexes were obtained by mixing the corresponding protein components at  
346 equimolar ratios and incubated on ice for 2 hours. The assembled complexes were further purified using the  
347 Superdex 200 Increase column and eluted with the final buffer. Purified complexes were concentrated to 7-  
348 10 mg/ml for crystallization. The crystallization experiments were performed at 18 °C, using the sitting-drop  
349 vapor diffusion method. Diffraction-quality crystals were obtained in the following solution conditions:

350 BD-236/RBD: 0.1 M sodium citrate, pH 5.0, and 8% (w/v) polyethylene glycol 8000;

351 BD-604/RBD: 0.2 M potassium phosphate dibasic, pH 9.2, and 20% (w/v) polyethylene glycol 3,350;

352 BD-629/RBD: 0.1 M sodium citrate tribasic dihydrate, pH 5.0, and 18% (w/v) polyethylene glycol 20,000;

353 BD-236/RBD/BD-368-2: 0.1 M sodium acetate, pH 4.0, and 10% (w/v) polyethylene glycol monomethyl  
354 ether 2,000;

355 BD-604/RBD/BD-368-2: 0.2 M ammonium sulfate, 12% (w/v) polyethylene glycol 8000;

356 BD-629/RBD/BD-368-2: 0.1 M imidazole, pH 7.0, 20% (w/v) polyethylene glycol 6,000.

357

358 For data collection, the crystals were transferred to a solution containing the crystallization solution  
359 supplemented with 20% ethylene glycol or 20% glycerol before they were flash-cooled in liquid nitrogen.  
360 Diffraction data were collected at the Shanghai Synchrotron Radiation Facility (beamline BL17U) and the  
361 National Facility for Protein Science Shanghai (beamline BL19U). The data were processed using HKL2000  
362 (HKL Research). All structures were solved by the molecular replacement method using the Phaser program  
363 (McCoy et al., 2007) in Phenix (Liebschner et al., 2019). The structural models were then manually adjusted  
364 in Coot (Emsley et al., 2010) and refined using Phenix.

365

#### 366 **Negative staining electron microscopy**

367 For the negative-staining study, S-2P, S-6P, and BD-368-2 Fab were diluted to 0.02 mg/ml using 25 mM  
368 HEPES, pH 7.2, 150 mM NaCl. BD-368-2 Fab was then mixed with S-2P or S-6P in a 1:1 volume ratio and  
369 incubated on ice for 3 min or at room temperature for 30 min. The mixture was then applied onto a glow-  
370 discharged carbon-coated copper grid (Zhong Jing Ke Yi, Beijing). After 1 min, the excess liquid was removed  
371 using a filter paper. The grids were then stained using 1% uranyl acetate for 30 seconds and air-dried. A Tecnai  
372 G2 20 Twin electron microscope (FEI) operated at 120 kV was used to examine the grids. Images were  
373 recorded using a CCD camera (Eagle, FEI).

374

### 375 **Cryo-EM data collection, processing, and structure building**

376 Holy-carbon gold grids (Quantifoil, R1.2/1.3) were glow-discharged for 30 seconds using a Solarus 950  
377 plasma cleaner (Gatan) with a 4:1 O<sub>2</sub>/H<sub>2</sub> ratio. Four microliter S-6P (0.2 mg/mL) and 0.5 microliter BD-368-  
378 2 Fab (1.2 mg/mL) were mixed on ice for 1 minute, and then quickly applied onto the glow-discharged grids.  
379 Afterward, the grids were blotted with a filter paper (Whatman No. 1) at 4 °C and 100% humidity, and  
380 plunged into the liquid ethane using a Vitrobot Mark IV (FEI). The grids were first screened using a 200 kV  
381 Talos Arctica microscope equipped with a Ceta camera (FEI). Data collection was carried out using a Titan  
382 Krios electron microscope (FEI) operated at 300 kV. Movies were recorded on a K2 Summit direct electron  
383 detector (Gatan) using the SerialEM software (Mastronarde, 2005), in the super-resolution mode at a  
384 nominal magnification of 130,000, with an exposure rate of 7.1875 e-/Å<sup>2</sup> per second. A GIF Quantum energy  
385 filter (Gatan) with a slit width of 20 eV was used at the end of the detector. The defocus range was set from -  
386 0.7 to -1.2 μm. The micrographs were dose-fractionated into 32 frames with a total exposure time of 8.32 s  
387 and a total electron exposure of 60 electrons per Å<sup>2</sup>. Statistics for data collection are summarized in Table  
388 S3.

389

390 The workflow of data processing was illustrated in Figure S6. A total of 5,273 movie stacks were recorded.  
391 Raw movie frames were aligned and averaged into motion-corrected summed images with a pixel size of  
392 1.055 Å by MotionCor2 (Zheng et al., 2017). The contrast transfer function (CTF) parameters of each  
393 motion-corrected image were estimated by the Gctf program (v1.06) (Zhang, 2016). Relion (v3.07) was used  
394 for all the following data processing (Zivanov et al., 2018). The S trimer (PDB ID: 6VSB) was used as a  
395 reference for the 3D classifications. The local resolution map was analyzed using ResMap (Kucukelbir et al.,  
396 2014) and displayed using UCSF Chimera (Pettersen et al., 2004).

397

398 The S trimer (PDB ID: 6VSB) and the Fv region of BD-368-2 Fab from the crystal structure described above  
399 were docked into the cryo-EM density using UCSF Chimera. Refinement was performed using the real-space  
400 refinement in Phenix. Figures were prepared using Pymol (Schrödinger) and UCSF Chimera.

401

402 **Acknowledgments**

403 We thank the staff of the Shanghai Synchrotron Radiation Facility (beamline BL17U) and the National  
404 Facility for Protein Science Shanghai (beamline BL19U) for assistance with X-ray data collection; the Core  
405 Facilities at the School of Life Sciences, Peking University for help with negative-staining EM; the Cryo-EM  
406 Platform of Peking University for the assistance with EM data collection; the High-performance Computing  
407 Platform of Peking University for the assistance with computation. The work was supported by the National  
408 Key Research and Development Program of China (2017YFA0505200 to J.X.), the National Science  
409 Foundation of China (31822014 to J.X.), the Qidong-SLS Innovation Fund (to J.X.).

410

411 **Author contributions**

412 X.S.X, X.D.S, and J.Y.X conceptualized the project, designed and coordinated the experiments. S.D and  
413 Q.Y.Z performed protein purification and crystallization experiments, with the help of X.X.D and H.X.  
414 Y.L.C led the NAbs discovery and characterization experiments. Q.Y.Z, H.X, B.W, C.G.J, and Q.S.W  
415 collected crystal diffraction data. Q.Y.Z and G.P.W prepared cryo-EM samples and collected data. G.P.W.  
416 processed the EM data, under the supervision of N.G. J.X. built the structural models and performed  
417 structural analyses. Y.L.C, X.S.X, X.D.S, and J.Y.X wrote the manuscript, with inputs from all the other  
418 authors.

419

420 **Conflict of Interests**

421 X.S.X and Y.L.C are inventors on the patent applications of the NAbs. Other authors declare no competing  
422 financial interests.

423

424 **References**

425

- 426 Bao, L., Deng, W., Huang, B., Gao, H., Liu, J., Ren, L., Wei, Q., Yu, P., Xu, Y., Qi, F., *et al.* (2020). The  
427 pathogenicity of SARS-CoV-2 in hACE2 transgenic mice. *Nature*.
- 428 Barnes, C.O., West, A.P., Jr., Huey-Tubman, K.E., Hoffmann, M.A.G., Sharaf, N.G., Hoffman, P.R.,  
429 Koranda, N., Gristick, H.B., Gaebler, C., Muecksch, F., *et al.* (2020). Structures of human antibodies bound  
430 to SARS-CoV-2 spike reveal common epitopes and recurrent features of antibodies. *bioRxiv*.
- 431 Baum, A., Fulton, B.O., Wloga, E., Copin, R., Pascal, K.E., Russo, V., Giordano, S., Lanza, K., Negron, N.,  
432 Ni, M., *et al.* (2020). Antibody cocktail to SARS-CoV-2 spike protein prevents rapid mutational escape seen  
433 with individual antibodies. *Science*.
- 434 Brouwer, P.J.M., Caniels, T.G., van der Straten, K., Snitselaar, J.L., Aldon, Y., Bangaru, S., Torres, J.L.,  
435 Okba, N.M.A., Claireaux, M., Kerster, G., *et al.* (2020). Potent neutralizing antibodies from COVID-19  
436 patients define multiple targets of vulnerability. *Science*.
- 437 Callaway, E., Cyranoski, D., Mallapaty, S., Stoye, E., and Tollefson, J. (2020). The coronavirus pandemic in  
438 five powerful charts. *Nature* 579, 482-483.
- 439 Cao, Y., Su, B., Guo, X., Sun, W., Deng, Y., Bao, L., Zhu, Q., Zhang, X., Zheng, Y., Geng, C., *et al.* (2020).  
440 Potent neutralizing antibodies against SARS-CoV-2 identified by high-throughput single-cell sequencing of  
441 convalescent patients' B cells. *Cell*.
- 442 Chi, X., Yan, R., Zhang, J., Zhang, G., Zhang, Y., Hao, M., Zhang, Z., Fan, P., Dong, Y., Yang, Y., *et al.*  
443 (2020). A neutralizing human antibody binds to the N-terminal domain of the Spike protein of SARS-CoV-2.  
444 *Science*.
- 445 Crank, M.C., Ruckwardt, T.J., Chen, M., Morabito, K.M., Phung, E., Costner, P.J., Holman, L.A., Hickman,  
446 S.P., Berkowitz, N.M., Gordon, I.J., *et al.* (2019). A proof of concept for structure-based vaccine design  
447 targeting RSV in humans. *Science* 365, 505-509.
- 448 Ekiert, D.C., Bhabha, G., Elsliger, M.A., Friesen, R.H., Jongeneelen, M., Throsby, M., Goudsmit, J., and  
449 Wilson, I.A. (2009). Antibody recognition of a highly conserved influenza virus epitope. *Science* 324, 246-  
450 251.
- 451 Emsley, P., Lohkamp, B., Scott, W.G., and Cowtan, K. (2010). Features and development of Coot. *Acta*  
452 *Crystallogr D Biol Crystallogr* 66, 486-501.
- 453 Gorny, M.K., Wang, X.H., Williams, C., Volsky, B., Revesz, K., Witover, B., Burda, S., Urbanski, M.,  
454 Nyambi, P., Krachmarov, C., *et al.* (2009). Preferential use of the VH5-51 gene segment by the human  
455 immune response to code for antibodies against the V3 domain of HIV-1. *Mol Immunol* 46, 917-926.
- 456 Graham, B.S., Gilman, M.S.A., and McLellan, J.S. (2019). Structure-Based Vaccine Antigen Design. *Annu*  
457 *Rev Med* 70, 91-104.
- 458 Hansen, J., Baum, A., Pascal, K.E., Russo, V., Giordano, S., Wloga, E., Fulton, B.O., Yan, Y., Koon, K.,  
459 Patel, K., *et al.* (2020). Studies in humanized mice and convalescent humans yield a SARS-CoV-2 antibody  
460 cocktail. *Science*.
- 461 Hoffmann, M., Kleine-Weber, H., Schroeder, S., Kruger, N., Herrler, T., Erichsen, S., Schiergens, T.S.,  
462 Herrler, G., Wu, N.H., Nitsche, A., *et al.* (2020). SARS-CoV-2 Cell Entry Depends on ACE2 and TMPRSS2  
463 and Is Blocked by a Clinically Proven Protease Inhibitor. *Cell* 181, 271-280 e278.
- 464 Hsieh, C.-L., Goldsmith, J.A., Schaub, J.M., DiVenere, A.M., Kuo, H.-C., Javanmardi, K., Le, K.C., Wrapp,  
465 D., Lee, A.G.-W., Liu, Y., *et al.* (2020). Structure-based Design of Prefusion-stabilized SARS-CoV-2  
466 Spikes. *bioRxiv*, 2020.2005.2030.125484.

- 467 Huo, J., Zhao, Y., Ren, J., Zhou, D., Duyvesteyn, H.M.E., Ginn, H.M., Carrique, L., Malinauskas, T., Ruza,  
468 R.R., Shah, P.N.M., *et al.* (2020). Neutralization of SARS-CoV-2 by Destruction of the Prefusion Spike. *Cell*  
469 *Host Microbe*.
- 470 Hurlburt, N.K., Wan, Y.-H., Stuart, A.B., Feng, J., McGuire, A.T., Stamatatos, L., and Pancera, M. (2020).  
471 Structural basis for potent neutralization of SARS-CoV-2 and role of antibody affinity maturation. *bioRxiv*,  
472 2020.2006.2012.148692.
- 473 Ju, B., Zhang, Q., Ge, J., Wang, R., Sun, J., Ge, X., Yu, J., Shan, S., Zhou, B., Song, S., *et al.* (2020). Human  
474 neutralizing antibodies elicited by SARS-CoV-2 infection. *Nature*.
- 475 Ke, Z., Oton, J., Qu, K., Cortese, M., Zila, V., McKeane, L., Nakane, T., Zivanov, J., Neufeldt, C.J., Lu,  
476 J.M., *et al.* (2020). Structures, conformations and distributions of SARS-CoV-2 spike protein trimers on  
477 intact virions. *bioRxiv*, 2020.2006.2027.174979.
- 478 Kim, S.I., Noh, J., Kim, S., Choi, Y., Yoo, D.K., Lee, Y., Lee, H., Jung, J., Kang, C.K., Song, K.-H., *et al.*  
479 (2020). Stereotypic Neutralizing VH Clonotypes Against SARS-CoV-2 RBD in COVID-19 Patients and the  
480 Healthy Population. *bioRxiv*, 2020.2006.2026.174557.
- 481 Kucukelbir, A., Sigworth, F.J., and Tagare, H.D. (2014). Quantifying the local resolution of cryo-EM density  
482 maps. *Nat Methods* *11*, 63-65.
- 483 Lan, J., Ge, J., Yu, J., Shan, S., Zhou, H., Fan, S., Zhang, Q., Shi, X., Wang, Q., Zhang, L., *et al.* (2020).  
484 Structure of the SARS-CoV-2 spike receptor-binding domain bound to the ACE2 receptor. *Nature* *581*, 215-  
485 220.
- 486 Liebschner, D., Afonine, P.V., Baker, M.L., Bunkoczi, G., Chen, V.B., Croll, T.I., Hintze, B., Hung, L.W.,  
487 Jain, S., McCoy, A.J., *et al.* (2019). Macromolecular structure determination using X-rays, neutrons and  
488 electrons: recent developments in Phenix. *Acta Crystallogr D Struct Biol* *75*, 861-877.
- 489 Liu, L., Wang, P., Nair, M.S., Yu, J., Huang, Y., Rapp, M.A., Wang, Q., Luo, Y., Sahi, V., Figueroa, A., *et*  
490 *al.* (2020). Potent Neutralizing Monoclonal Antibodies Directed to Multiple Epitopes on the SARS-CoV-2  
491 Spike. *bioRxiv*, 2020.2006.2017.153486.
- 492 Marasca, R., Vaccari, P., Luppi, M., Zucchini, P., Castelli, I., Barozzi, P., Cuoghi, A., and Torelli, G. (2001).  
493 Immunoglobulin gene mutations and frequent use of VH1-69 and VH4-34 segments in hepatitis C virus-  
494 positive and hepatitis C virus-negative nodal marginal zone B-cell lymphoma. *Am J Pathol* *159*, 253-261.
- 495 Mastrorade, D.N. (2005). Automated electron microscope tomography using robust prediction of specimen  
496 movements. *J Struct Biol* *152*, 36-51.
- 497 McCoy, A.J., Grosse-Kunstleve, R.W., Adams, P.D., Winn, M.D., Storoni, L.C., and Read, R.J. (2007).  
498 Phaser crystallographic software. *J Appl Crystallogr* *40*, 658-674.
- 499 Nie, J., Li, Q., Wu, J., Zhao, C., Hao, H., Liu, H., Zhang, L., Nie, L., Qin, H., Wang, M., *et al.* (2020).  
500 Establishment and validation of a pseudovirus neutralization assay for SARS-CoV-2. *Emerg Microbes Infect*  
501 *9*, 680-686.
- 502 Pettersen, E.F., Goddard, T.D., Huang, C.C., Couch, G.S., Greenblatt, D.M., Meng, E.C., and Ferrin, T.E.  
503 (2004). UCSF Chimera—A Visualization System for Exploratory Research and Analysis. *J Comput Chem*  
504 *25*, 1605-1612.
- 505 Pinto, D., Park, Y.J., Beltramello, M., Walls, A.C., Tortorici, M.A., Bianchi, S., Jaconi, S., Culap, K., Zatta,  
506 F., De Marco, A., *et al.* (2020). Cross-neutralization of SARS-CoV-2 by a human monoclonal SARS-CoV  
507 antibody. *Nature*.
- 508 Robbiani, D.F., Gaebler, C., Muecksch, F., Lorenzi, J.C.C., Wang, Z., Cho, A., Agudelo, M., Barnes, C.O.,  
509 Gazumyan, A., Finkin, S., *et al.* (2020). Convergent antibody responses to SARS-CoV-2 in convalescent  
510 individuals. *Nature*.



- 511 Rogers, T.F., Zhao, F., Huang, D., Beutler, N., Burns, A., He, W.T., Limbo, O., Smith, C., Song, G., Woehl,  
512 J., *et al.* (2020). Isolation of potent SARS-CoV-2 neutralizing antibodies and protection from disease in a  
513 small animal model. *Science*.
- 514 Seydoux, E., Homad, L.J., MacCamy, A.J., Parks, K.R., Hurlburt, N.K., Jennewein, M.F., Akins, N.R.,  
515 Stuart, A.B., Wan, Y.H., Feng, J., *et al.* (2020). Analysis of a SARS-CoV-2-Infected Individual Reveals  
516 Development of Potent Neutralizing Antibodies with Limited Somatic Mutation. *Immunity*.
- 517 Shang, J., Ye, G., Shi, K., Wan, Y., Luo, C., Aihara, H., Geng, Q., Auerbach, A., and Li, F. (2020).  
518 Structural basis of receptor recognition by SARS-CoV-2. *Nature* *581*, 221-224.
- 519 Shi, R., Shan, C., Duan, X., Chen, Z., Liu, P., Song, J., Song, T., Bi, X., Han, C., Wu, L., *et al.* (2020). A  
520 human neutralizing antibody targets the receptor binding site of SARS-CoV-2. *Nature*.
- 521 Tian, X., Li, C., Huang, A., Xia, S., Lu, S., Shi, Z., Lu, L., Jiang, S., Yang, Z., Wu, Y., *et al.* (2020). Potent  
522 binding of 2019 novel coronavirus spike protein by a SARS coronavirus-specific human monoclonal  
523 antibody. *Emerg Microbes Infect* *9*, 382-385.
- 524 Walls, A.C., Park, Y.J., Tortorici, M.A., Wall, A., McGuire, A.T., and Veesler, D. (2020). Structure,  
525 Function, and Antigenicity of the SARS-CoV-2 Spike Glycoprotein. *Cell* *181*, 281-292 e286.
- 526 Walls, A.C., Xiong, X., Park, Y.J., Tortorici, M.A., Snijder, J., Quispe, J., Cameroni, E., Gopal, R., Dai, M.,  
527 Lanzavecchia, A., *et al.* (2019). Unexpected Receptor Functional Mimicry Elucidates Activation of  
528 Coronavirus Fusion. *Cell* *176*, 1026-1039 e1015.
- 529 Wang, C., Li, W., Drabek, D., Okba, N.M.A., van Haperen, R., Osterhaus, A., van Kuppeveld, F.J.M.,  
530 Haagmans, B.L., Grosveld, F., and Bosch, B.J. (2020a). A human monoclonal antibody blocking SARS-  
531 CoV-2 infection. *Nat Commun* *11*, 2251.
- 532 Wang, Q., Zhang, Y., Wu, L., Niu, S., Song, C., Zhang, Z., Lu, G., Qiao, C., Hu, Y., Yuen, K.Y., *et al.*  
533 (2020b). Structural and Functional Basis of SARS-CoV-2 Entry by Using Human ACE2. *Cell* *181*, 894-904  
534 e899.
- 535 Wec, A.Z., Wrapp, D., Herbert, A.S., Maurer, D.P., Haslwanter, D., Sakharkar, M., Jangra, R.K., Dieterle,  
536 M.E., Lilov, A., Huang, D., *et al.* (2020). Broad neutralization of SARS-related viruses by human  
537 monoclonal antibodies. *Science*.
- 538 Wrapp, D., Wang, N., Corbett, K.S., Goldsmith, J.A., Hsieh, C.L., Abiona, O., Graham, B.S., and McLellan,  
539 J.S. (2020). Cryo-EM structure of the 2019-nCoV spike in the prefusion conformation. *Science* *367*, 1260-  
540 1263.
- 541 Wu, Y., Wang, F., Shen, C., Peng, W., Li, D., Zhao, C., Li, Z., Li, S., Bi, Y., Yang, Y., *et al.* (2020). A  
542 noncompeting pair of human neutralizing antibodies block COVID-19 virus binding to its receptor ACE2.  
543 *Science*.
- 544 Xu, C., Wang, Y., Liu, C., Zhang, C., Han, W., Hong, X., Wang, Y., Hong, Q., Wang, S., Zhao, Q., *et al.*  
545 (2020). Conformational dynamics of SARS-CoV-2 trimeric spike glycoprotein in complex with receptor  
546 ACE2 revealed by cryo-EM. *bioRxiv*, 2020.2006.2030.177097.
- 547 Yan, R., Zhang, Y., Li, Y., Xia, L., Guo, Y., and Zhou, Q. (2020). Structural basis for the recognition of  
548 SARS-CoV-2 by full-length human ACE2. *Science* *367*, 1444-1448.
- 549 Yuan, M., Liu, H., Wu, N.C., Lee, C.-C.D., Zhu, X., Zhao, F., Huang, D., Yu, W., Hua, Y., Tien, H., *et al.*  
550 (2020a). Structural basis of a public antibody response to SARS-CoV-2. *bioRxiv*, 2020.2006.2008.141267.
- 551 Yuan, M., Wu, N.C., Zhu, X., Lee, C.D., So, R.T.Y., Lv, H., Mok, C.K.P., and Wilson, I.A. (2020b). A  
552 highly conserved cryptic epitope in the receptor binding domains of SARS-CoV-2 and SARS-CoV. *Science*  
553 *368*, 630-633.
- 554 Zhang, K. (2016). Gctf: Real-time CTF determination and correction. *J Struct Biol* *193*, 1-12.

555 Zheng, S.Q., Palovcak, E., Armache, J.P., Verba, K.A., Cheng, Y., and Agard, D.A. (2017). MotionCor2:  
556 anisotropic correction of beam-induced motion for improved cryo-electron microscopy. *Nat Methods* *14*,  
557 331-332.

558 Zhou, D., Duyvesteyn, H.M., Chen, C.-P., Huang, C.-G., Chen, T.-H., Shih, S.-R., Lin, Y.-C., Cheng, C.-Y.,  
559 Cheng, S.-H., Huang, Y.-C., *et al.* (2020a). Structural basis for the neutralization of SARS-CoV-2 by an  
560 antibody from a convalescent patient. *bioRxiv*, 2020.2006.2012.148387.

561 Zhou, T., Tsybovsky, Y., Olia, A.S., Gorman, J., Rapp, M.A., Cerutti, G., Katsamba, P.S., Nazzari, A.,  
562 Schön, A., Wang, P., *et al.* (2020b). A pH-dependent switch mediates conformational masking of SARS-  
563 CoV-2 spike. *bioRxiv*, 2020.2007.2004.187989.

564 Zivanov, J., Nakane, T., Forsberg, B.O., Kimanius, D., Hagen, W.J., Lindahl, E., and Scheres, S.H. (2018).  
565 New tools for automated high-resolution cryo-EM structure determination in RELION-3. *Elife* *7*.  
566  
567

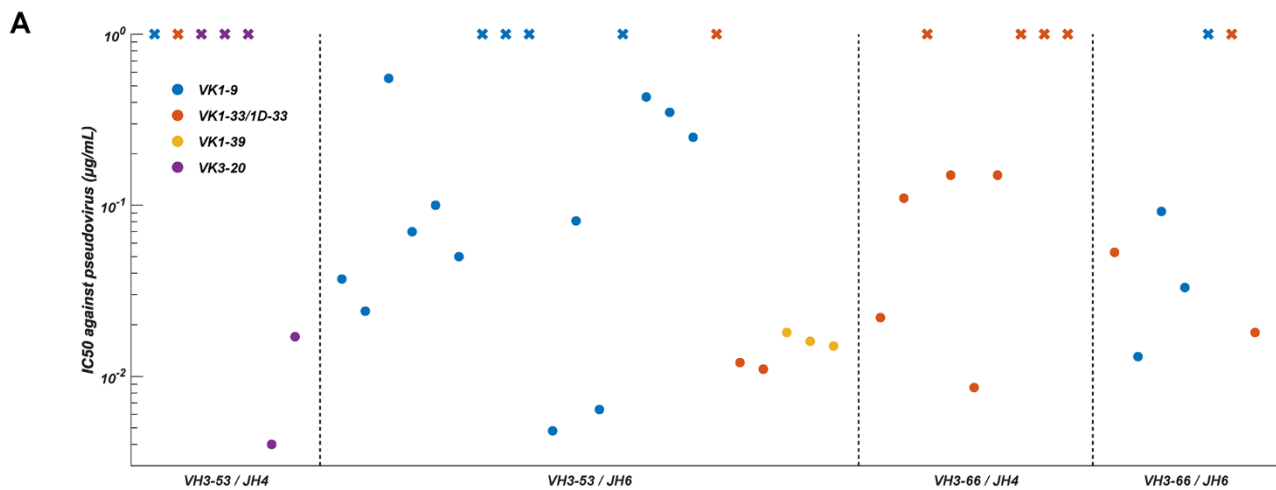

**B**

Characterization of potent VH3-53/VH3-66 convergent NAbs

| mAbs   | Viral protein binding |                     | Pseudovirus neutralization |                          | VDJ combination |                |                |                |
|--------|-----------------------|---------------------|----------------------------|--------------------------|-----------------|----------------|----------------|----------------|
|        | Target antigen        | K <sub>D</sub> (nM) | IC <sub>50</sub> (µg/mL)   | IC <sub>80</sub> (µg/mL) | V <sub>H</sub>  | J <sub>H</sub> | V <sub>L</sub> | J <sub>L</sub> |
| BD-602 | RBD                   | 0.32                | 0.011                      | 0.12                     | VH3-53          | JH6            | VK1D-33        | JK4            |
| BD-604 | RBD                   | 0.15                | 0.005                      | 0.043                    | VH3-53          | JH6            | VK1-9          | JK2            |
| BD-606 | RBD                   | 0.20                | 0.006                      | 0.069                    | VH3-53          | JH6            | VK1-9          | JK4            |
| BD-612 | RBD                   | 0.24                | 0.018                      | 0.16                     | VH3-66          | JH6            | VK1D-33        | JK4            |
| BD-617 | RBD                   | 0.36                | 0.009                      | 0.094                    | VH3-66          | JH4            | VK1D-33        | JK1            |
| BD-629 | RBD                   | 0.14                | 0.004                      | 0.060                    | VH3-53          | JH4            | VK3-20         | JK1            |
| BD-632 | RBD                   | 2.3                 | 0.017                      | 0.14                     | VH3-53          | JH4            | VK3-20         | JK1            |

568

569

**Figure 1. Binding affinity and neutralizing abilities of VH3-53/VH3-66 derived antibodies.**

570

(A) The distribution of IC<sub>50</sub> against SARS-CoV-2 pseudovirus for VH3-53/VH3-66 derived antibodies revealed by high-throughput single-cell sequencing. Data for each antibody were obtained from a representative neutralization experiment, which contains three replicates. IC<sub>50</sub> was calculated by using a four-parameter logistic curve-fitting and represented as mean. Each antibody's heavy chain V-J gene is indicated on the x-axis, where the light chain V gene is indicated by different colors, as shown in the legend. A cross mark indicates that the antibody's IC<sub>50</sub> is higher than 1 µg/mL. The detailed characteristics of the antibodies shown here are listed in Table S1.

577

(B) Characteristics of the potent VH3-53/VH3-66 convergent NAbs selected based on VDJ sequences. K<sub>D</sub> targeting RBD was measured by using surface plasmon resonance (SPR) with a 1:1 binding model. See also Figure S1 and Figure S2.

580

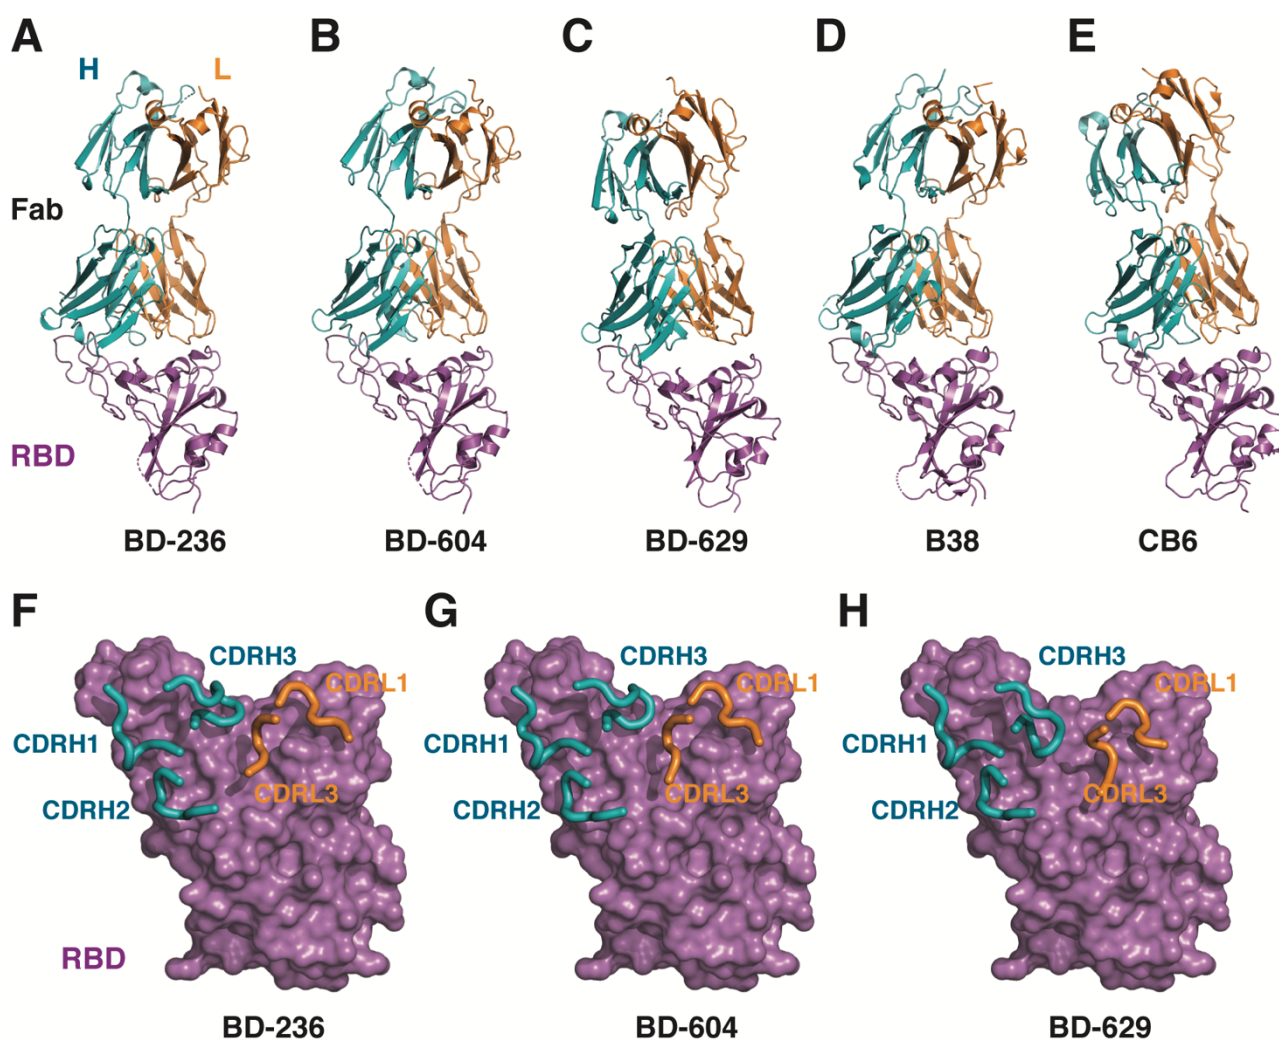

581

582 **Figure 2. The *VH3-53/VH3-66* antibodies bind to RBD in a similar manner.**

583 (A) The crystal structure of BD-236 Fab in complex with RBD. The heavy chain (H) and light chain (L) of  
584 BD-236 Fab are shown in teal and orange, respectively. The RBD is shown in magenta. Disordered regions  
585 are depicted as dashed lines.

586 (B) The crystal structure of BD-604 Fab in complex with RBD.

587 (C) The crystal structure of BD-629 Fab in complex with RBD.

588 (D) The crystal structure of B38 Fab in complex with RBD (PDB ID: 7BZ5).

589 (E) The crystal structure of CB6 Fab in complex with RBD (PDB ID: 7C01).

590 (F) Three heavy chain CDRs (CDRH1-3) and two light chain CDRs (CDRL1, CDRL3) in BD-236 Fab  
591 mediate the interaction with RBD. The CDRs are highlighted using thicker ribbons. RBD is shown in a  
592 surface view.

593 (G) Interactions between BD-604 Fab and RBD.

594 (H) Interactions between BD-629 Fab and RBD.

595

596

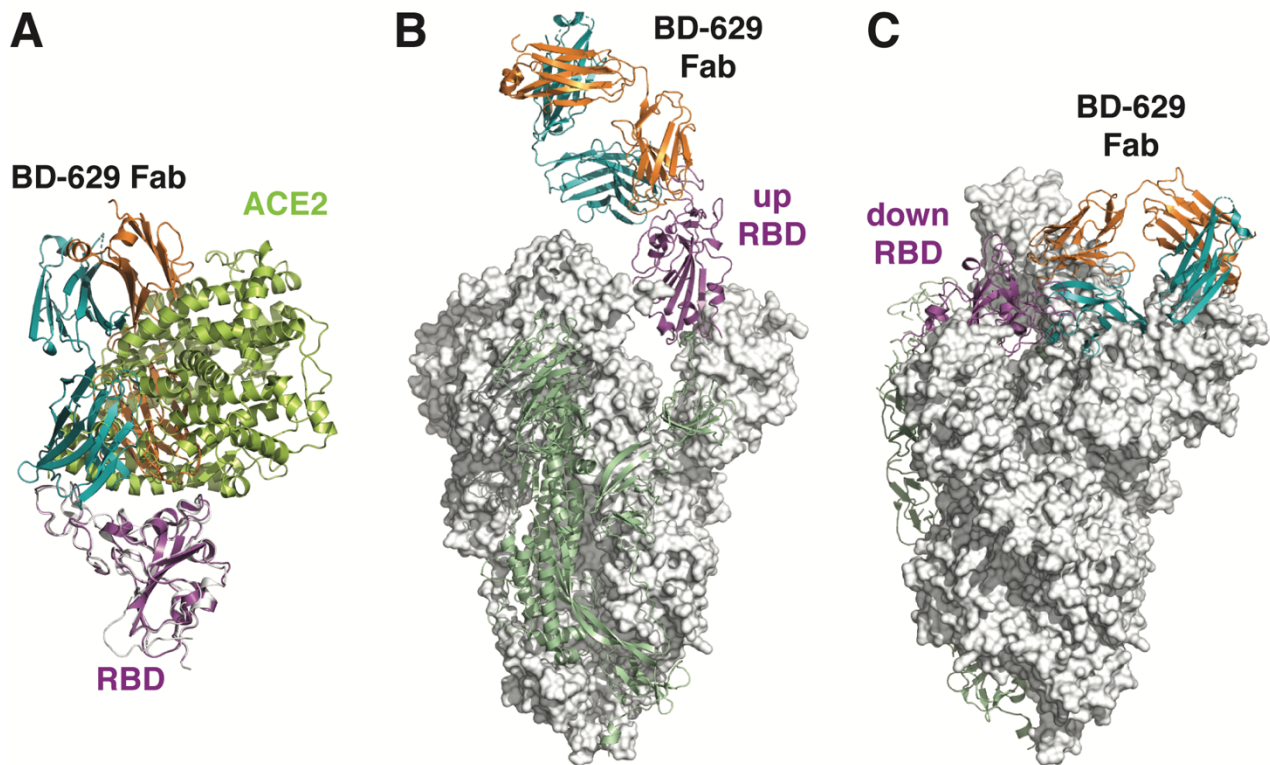

597

598 **Figure 3. The *VH3-53/VH3-66* antibodies can only interact with the RBDs in the “up” conformation.**

599 (A) The *VH3-53/VH3-66* antibodies would block the interaction between RBD and ACE2. The structure of  
600 RBD/BD-629 Fab complex is overlaid onto that of the RBD/ACE2 complex (PDB ID: 6LZG), revealing that  
601 the epitope of BD-629 largely overlaps with the binding site of ACE2. RBD and ACE2 in the RBD/ACE2  
602 complex are shown in white and lemon, respectively. The RBD/BD-629 Fab complex is shown using the  
603 same colors as in Figure 2.

604 (B) BD-629 Fab is modeled onto the “up” RBD in the S trimer (PDB ID: 6VSB) by structural  
605 superimpositions. The “up” RBD is shown in magenta, and the rest of that S protomer is shown in green. The  
606 other two S protomers are shown on white surfaces.

607 (C) BD-629 Fab is modeled onto one of the “down” RBD in the same S trimer structure. The “down” RBD is  
608 not available for the interaction with BD-629, due to the steric hindrance imposed by an adjacent protomer.  
609

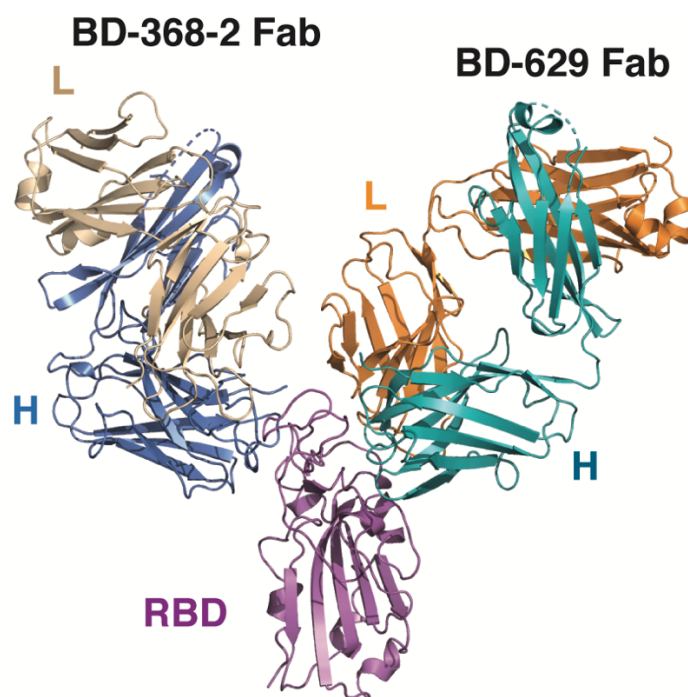

610

611 **Figure 4. BD-368-2 can bind to the RBD together with the *VH3-53/VH3-66* antibodies.**

612 The crystal structure of RBD in complex with the Fabs of both BD-368-2 and BD-629 is shown in ribbon  
613 diagrams. The heavy chain and light chain of BD-368-2 Fab are shown in marine and wheat, respectively.

614 RBD and BD-629 Fab are shown using the same color scheme as in Figure 2.

615

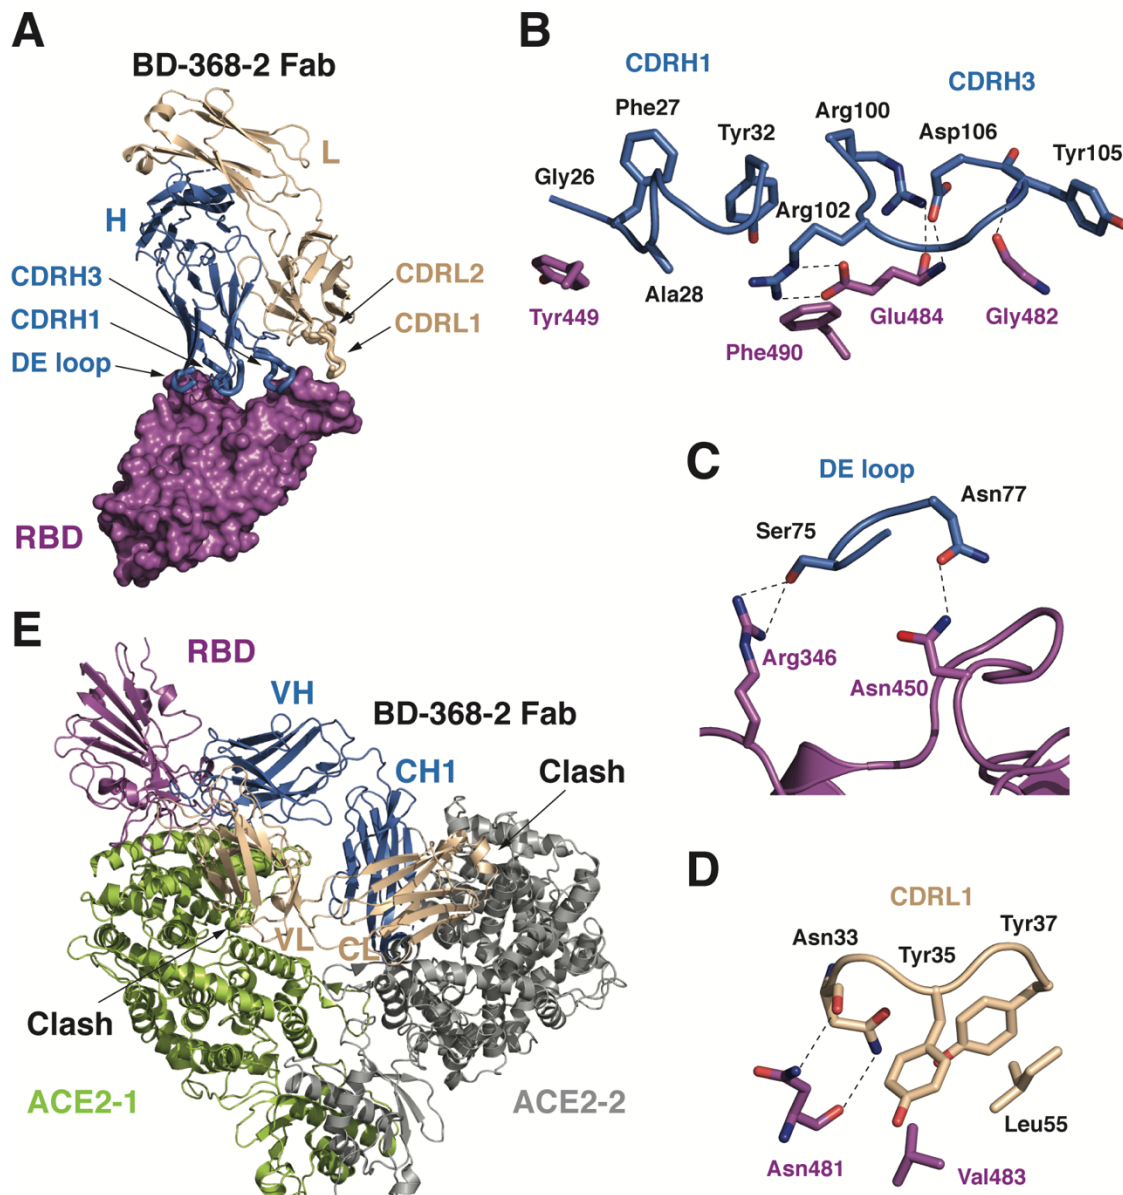

616

617 **Figure 5. The interactions between BD-368-2 Fab and RBD.**

618 (A) RBD is shown in a surface view. BD-368-2 Fab is shown in ribbons. The five regions in BD-368-2 that  
619 interact with RBD are highlighted using thicker ribbons.

620 (B) Interactions between CDRH1, CDRH3, and RBD. Polar interactions are indicated by dashed lines.

621 (C) Interactions between the DE loop in the BD-368-2 VH domain and RBD.

622 (D) Interactions between the BD-368-2's VL domain and RBD.

623 (E) BD-368-2 impedes the interaction between RBD and ACE2. The structure of RBD in the RBD/BD-368-2

624 complex is overlaid onto the RBD in the RBD/ACE2/B<sup>0</sup>AT1 complex (PDB ID: 6M17). BD-368-2 would

625 clash with both protomers in the ACE2 dimer and therefore interfere with the interaction between RBD and

626 ACE2.

627

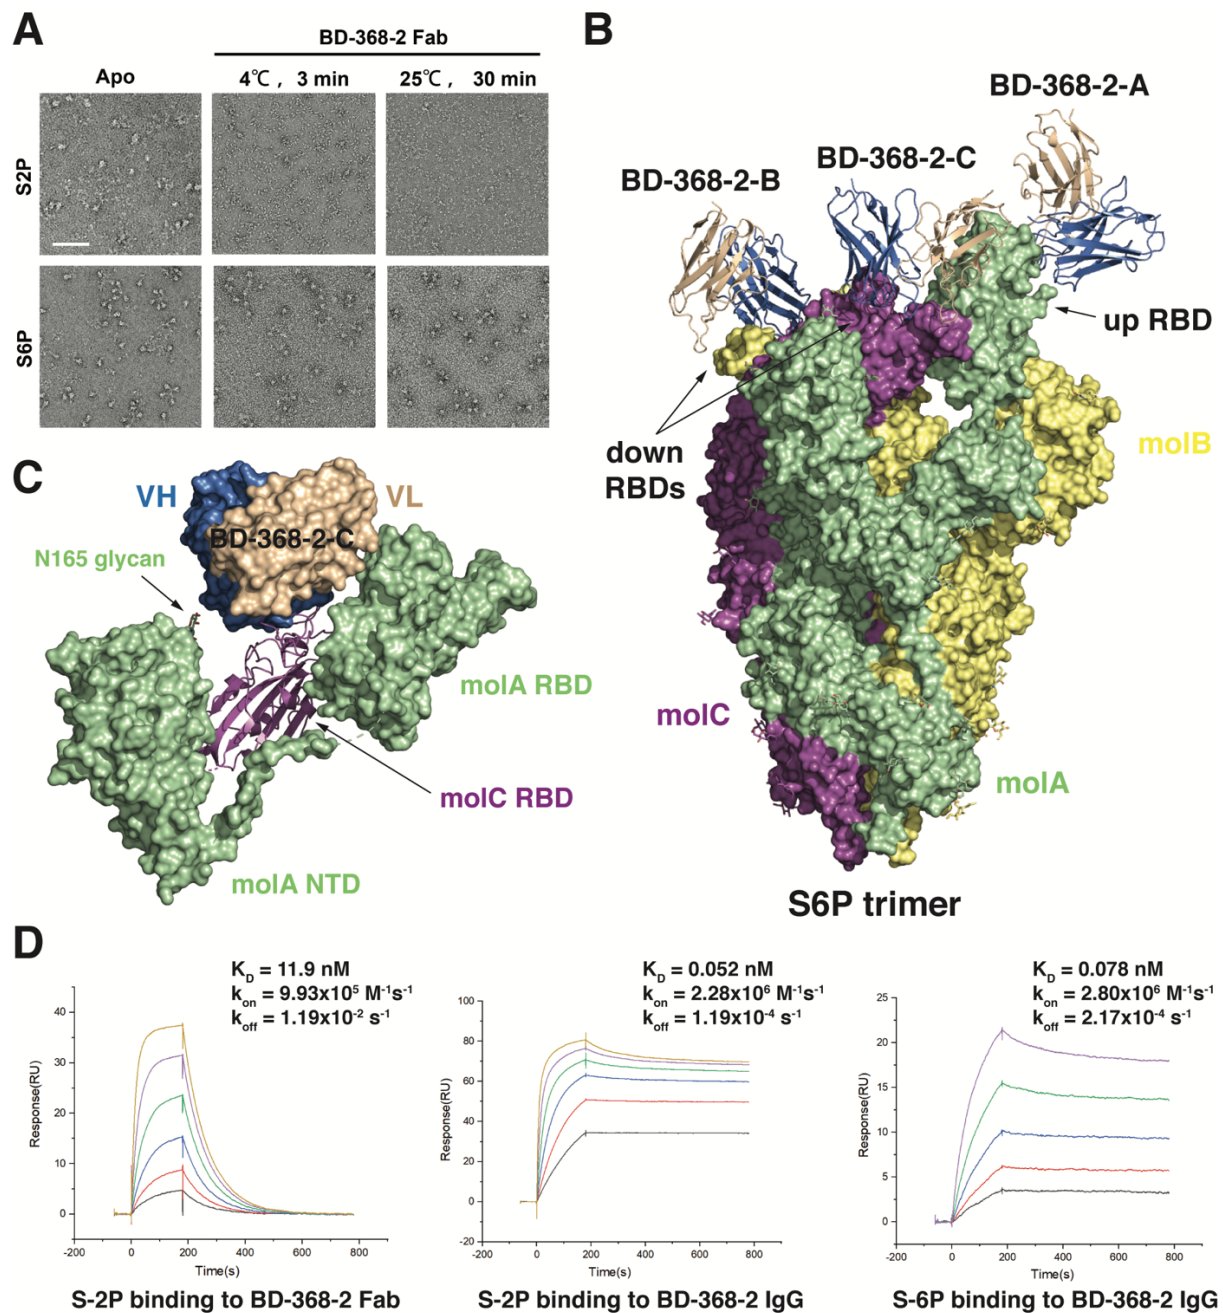

628

629 **Figure 6. Cryo-EM structure of BD-368-2 Fabs in complex with the S-6P trimer.**

630 (A) BD-368-2 Fab induced significant structural changes of S-2P, as assessed by the negative stain EM. S-2P  
 631 and S-6P both exist as stable trimers by themselves. Upon the treatment of BD-368-2 Fab, S-2P exhibits  
 632 significant structural changes, whereas S-6P is more stable. The scale bar is 100 nm.

633 (B) Cryo-EM structure of the S-6P trimer in complex with three BD-368-2 Fabs reconstructed at 3.5 Å. The  
 634 S-6P trimer is depicted using a surface representation with the three protomers shown in green (molA),  
 635 yellow (molB), and magenta (molC), respectively. The RBD in molA exhibits an “up” conformation,  
 636 whereas RBDs in molB and molC are “down”. The Fv region of BD-368-2 Fab is shown in marine and  
 637 wheat ribbons.

638 (C) BD-368-2-C, which mainly interacts with the RBD in molC, appears to also contact the NTD and RBD  
 639 in molA.

640 (D) Surface plasmon resonance sensorgrams showing the binding between the S trimers and BD-368-2 Fab  
 641 or IgG.



642

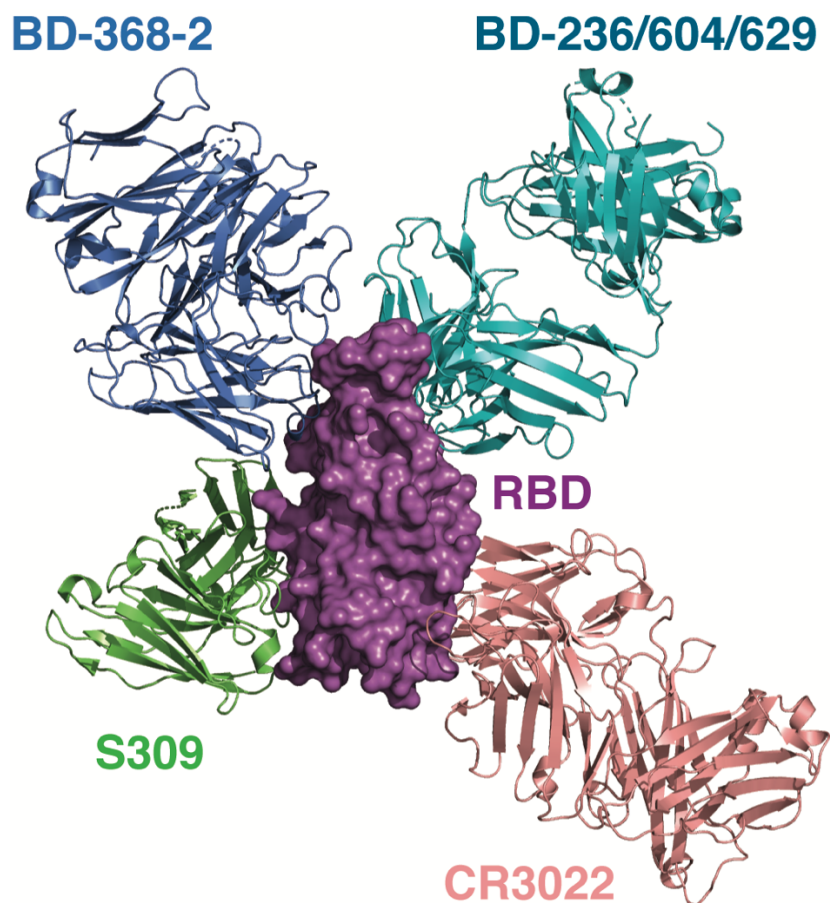

643

644 **Figure 7. BD-368-2 can bind to the RBD together with the *VH3-53/VH3-66* antibodies, S309, and**  
645 **CR3022.**

646 The structures of the SARS-CoV-2 S in complex with S309 (PDB ID: 6WPS) and RBD in complex with  
647 CR3022 (PDB ID: 6W41) are superimposed onto the structure of BD-368-2/RBD/BD-629 to illustrate their  
648 binding modes. These antibodies have non-overlapping epitopes on RBD.

649

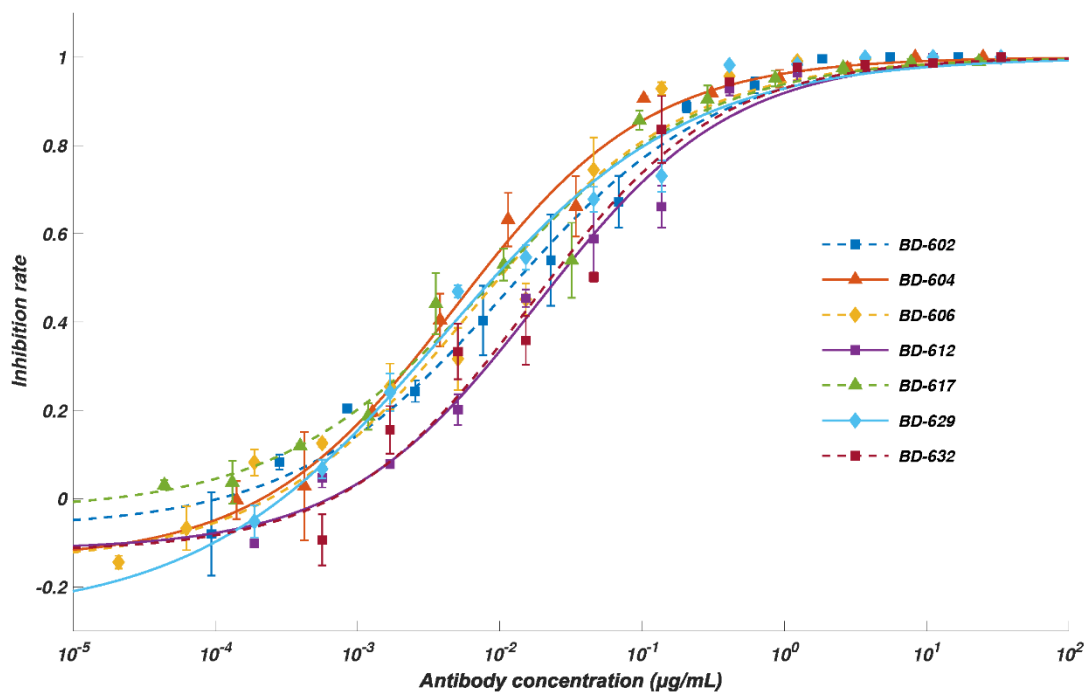

650

651 **Figure S1. Neutralization ability of the potent *VH3-53/VH3-66* derived NAbS measured by SARS-CoV-**  
652 **2 pseudovirus. Related to Figure 1**

653 Neutralization potency measured by a SARS-CoV-2 spike-pseudotyped VSV neutralization assay. Data for  
654 each NAb were obtained from a representative neutralization experiment, which contains three replicates. Data  
655 are represented as mean  $\pm$  SD. IC<sub>50</sub> and IC<sub>80</sub> were calculated by fitting a four-parameter logistic curve.

656

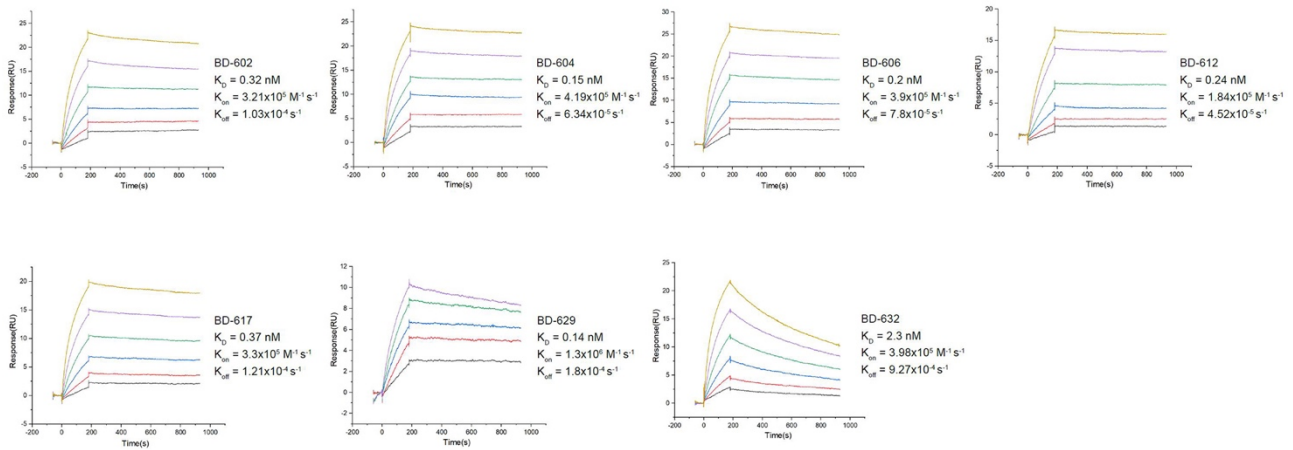

657

658

659 **Figure S2.  $K_D$  measurement for the potent *VH3-53/VH3-66* derived NAb. Related to Figure 1.**

660 Measurement of the dissociation constant against RBD for the representing NAb.  $K_D$  is calculated using a 1:1

661 binding model. All analyses were performed by using a serial 2-fold dilution of biotinylated RBD, starting

662 from 50 nM (yellow) to 1.56 nM (black).

663

664

665

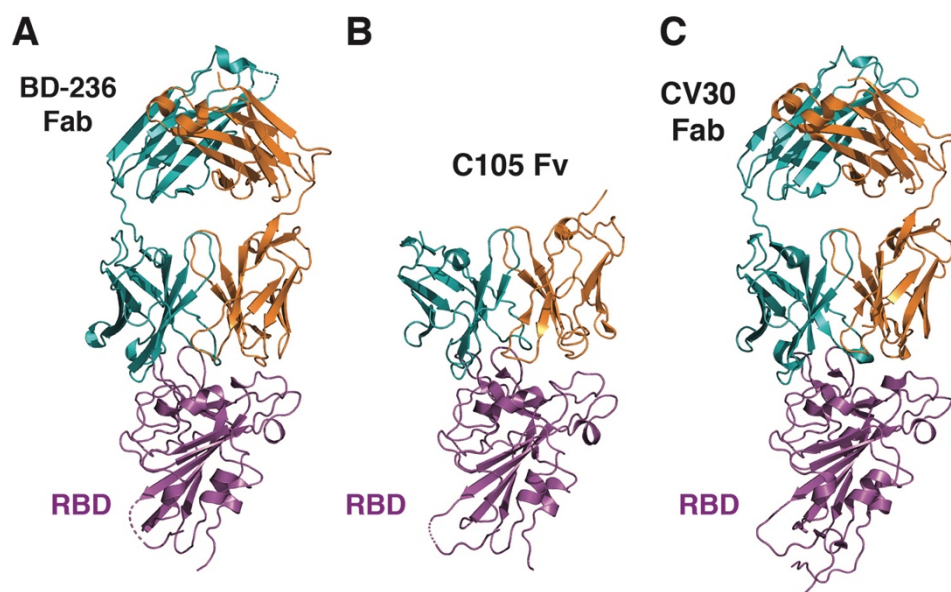

666

667 **Figure S3. The *VH3-53/VH3-66* antibodies bind to RBD in a similar manner, Related to Figure 2**

668 (A) The crystal structure of BD-236 Fab in complex with RBD.

669 (B) C105 Fv in complex with RBD in the cryo-EM structure (PDB ID: 6XCM).

670 (C) The crystal structure of CV30 Fab in complex with RBD (PDB ID: 6XE1).

671

**A**

|          |                                                      |       |                          |           |     |
|----------|------------------------------------------------------|-------|--------------------------|-----------|-----|
|          |                                                      | CDR1  |                          | CDR2      |     |
| BD236-VH | EVQLVESGGGLIQPGGSLRLSCAASG                           | I     | VSSNYMSWVRQAPGKGLEWVSVI  | YSGGSTDYA | 60  |
| BD604-VH | EVQLVESGGGLIQPGGSLRLSCAASG                           | I     | VSSNYMTWVRQAPGKGLEWVSVI  | YSGGSTFYA | 60  |
| BD629-VH | EVQLVESGGGLIQPGGSLRLSCAASE                           | F     | IVSRNYMSWVRQAPGKGLEWVSVI | YSGGSTIYA | 60  |
|          | *****:                                               | **    | ***:                     | *****     | **  |
|          |                                                      |       |                          |           |     |
|          |                                                      |       | CDR3                     |           |     |
| BD236-VH | DSVKGRFTISRDKSKNTLYLQMNSLRAEDTAVYYCARDLGEAGGMDVWGQGT |       |                          |           | 118 |
| BD604-VH | DSVKGRFTISRDNKNTLYLQMSSLRAEDTAVYYCARDLGPY-GMDVWGQGT  |       |                          |           | 117 |
| BD629-VH | DSVKGRFTISRDNKNTLNLQMNSLRAEDTAVYYCARDVGDY-VFDYWGQGT  |       |                          |           | 117 |
|          | *****:                                               | ***** | ***.                     | *****     | *   |

**B**

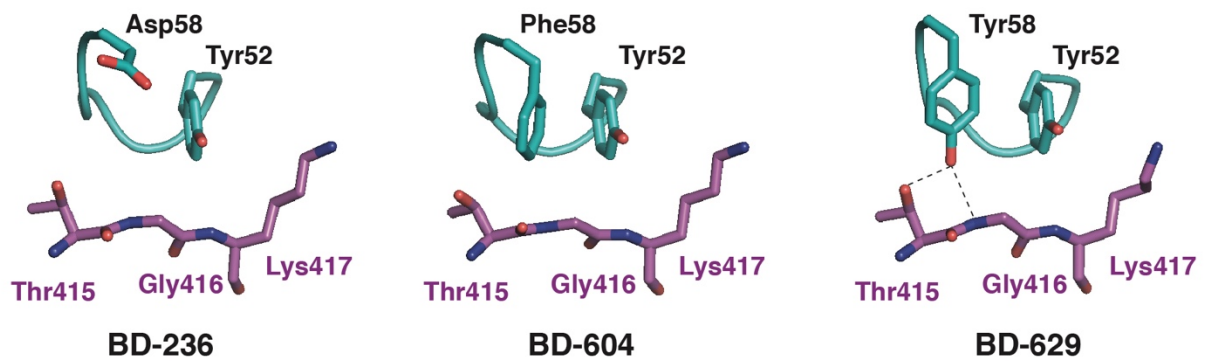

**C**

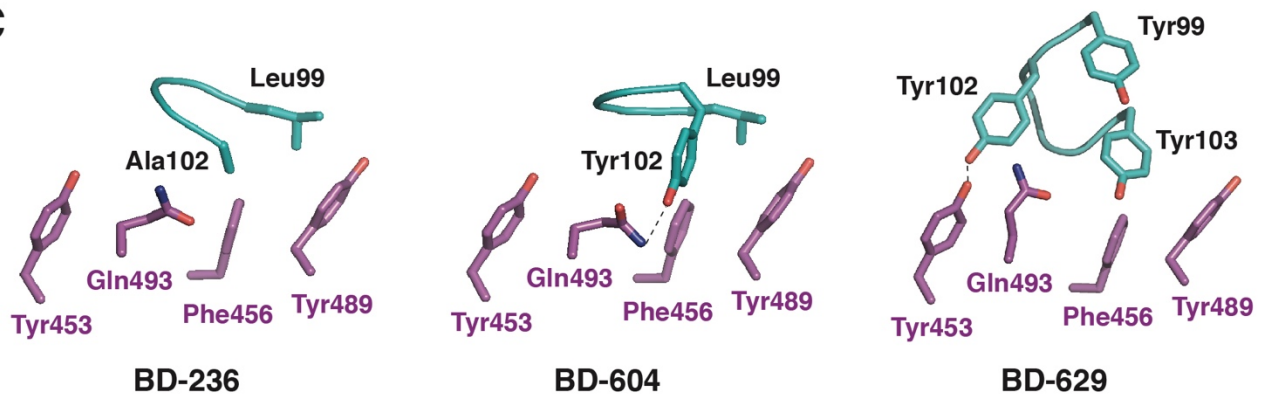

672

673

674

675

676

677

678

**Figure S4. Structural comparison of the VH domains of the *VH3-53/VH3-66* antibodies, Related to Figure 2**

(A) Sequence alignment of the VH domains of BD-236, BD-604, and BD-629.

(B) Structure comparisons of the interactions with RBD mediated by the CDRH2s of these antibodies.

(C) Structure comparisons of the interactions with RBD mediated by CDRH3s.

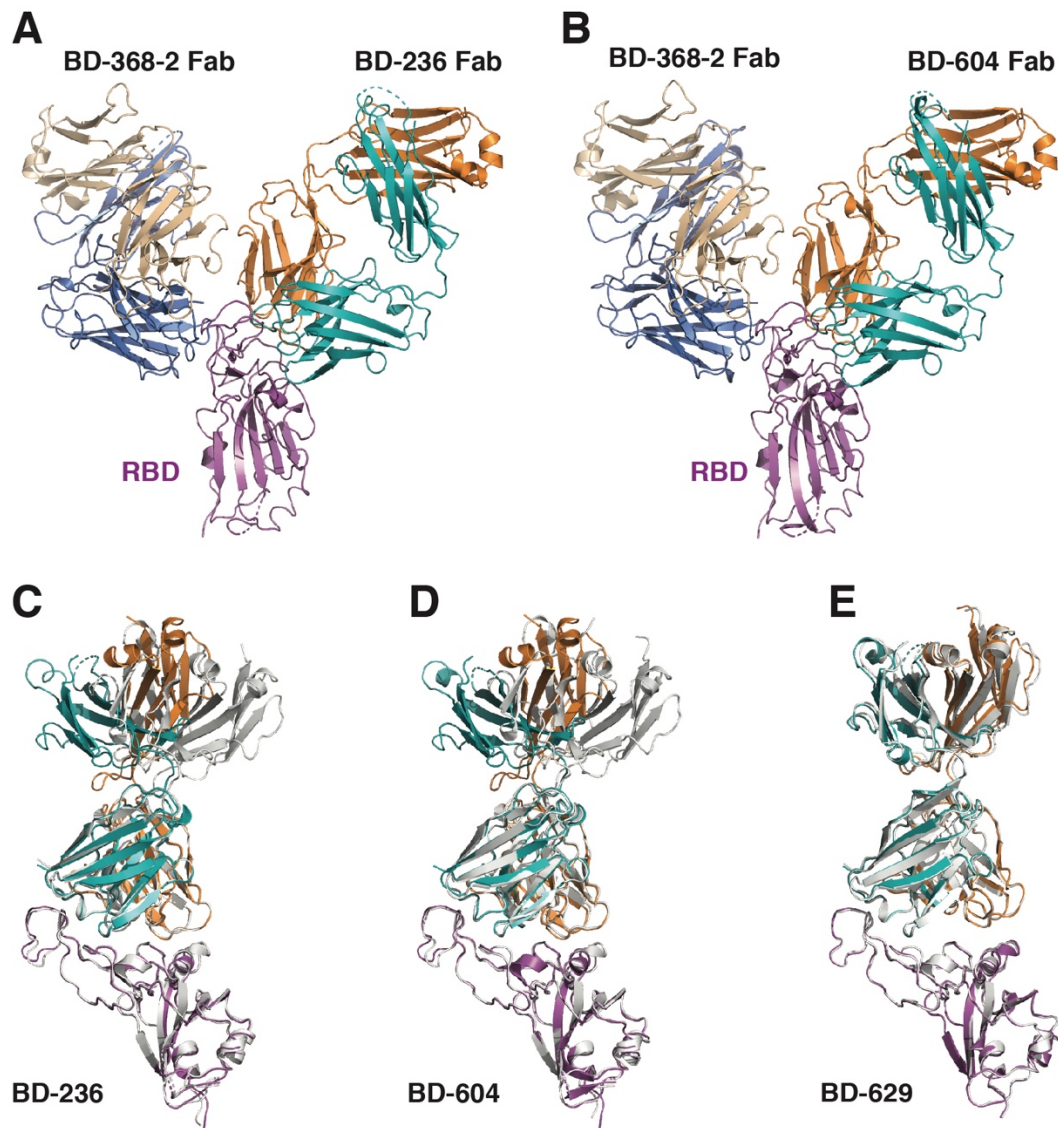

679

680 **Figure S5. Structures of the *VH3-53/VH3-66* antibodies in binary and tripartite complexes with RBD**  
681 **and BD-368-2, Related to Figure 4**

682 (A) Crystal structure of RBD in complex with the Fabs of both BD-368-2 and BD-236.

683 (B) Crystal structure of RBD in complex with the Fabs of both BD-368-2 and BD-604.

684 (C) Structural comparison of BD-236 in the BD-236/RBD binary and BD-236/RBD/BD-368-2 tripartite  
685 complexes. The binary complex structure, shown in white ribbons, is overlaid onto the tripartite complex  
686 shown in colored ribbons. BD-368-2 in the tripartite complex is not shown for clarity. RBD and the Fv  
687 region of BD-236 are largely superimposable in the two structures. A difference in the elbow angle of the  
688 BD-236 Fab is seen between the two structures due to flexibility.

689 (D) BD-604 exhibits a similar structure in the tripartite and binary complexes except for the elbow angle.  
690 The binary complex is shown in white.

691 (E) BD-629 exhibits a similar structure in the tripartite and binary complexes. The binary complex is shown  
692 in white.

693

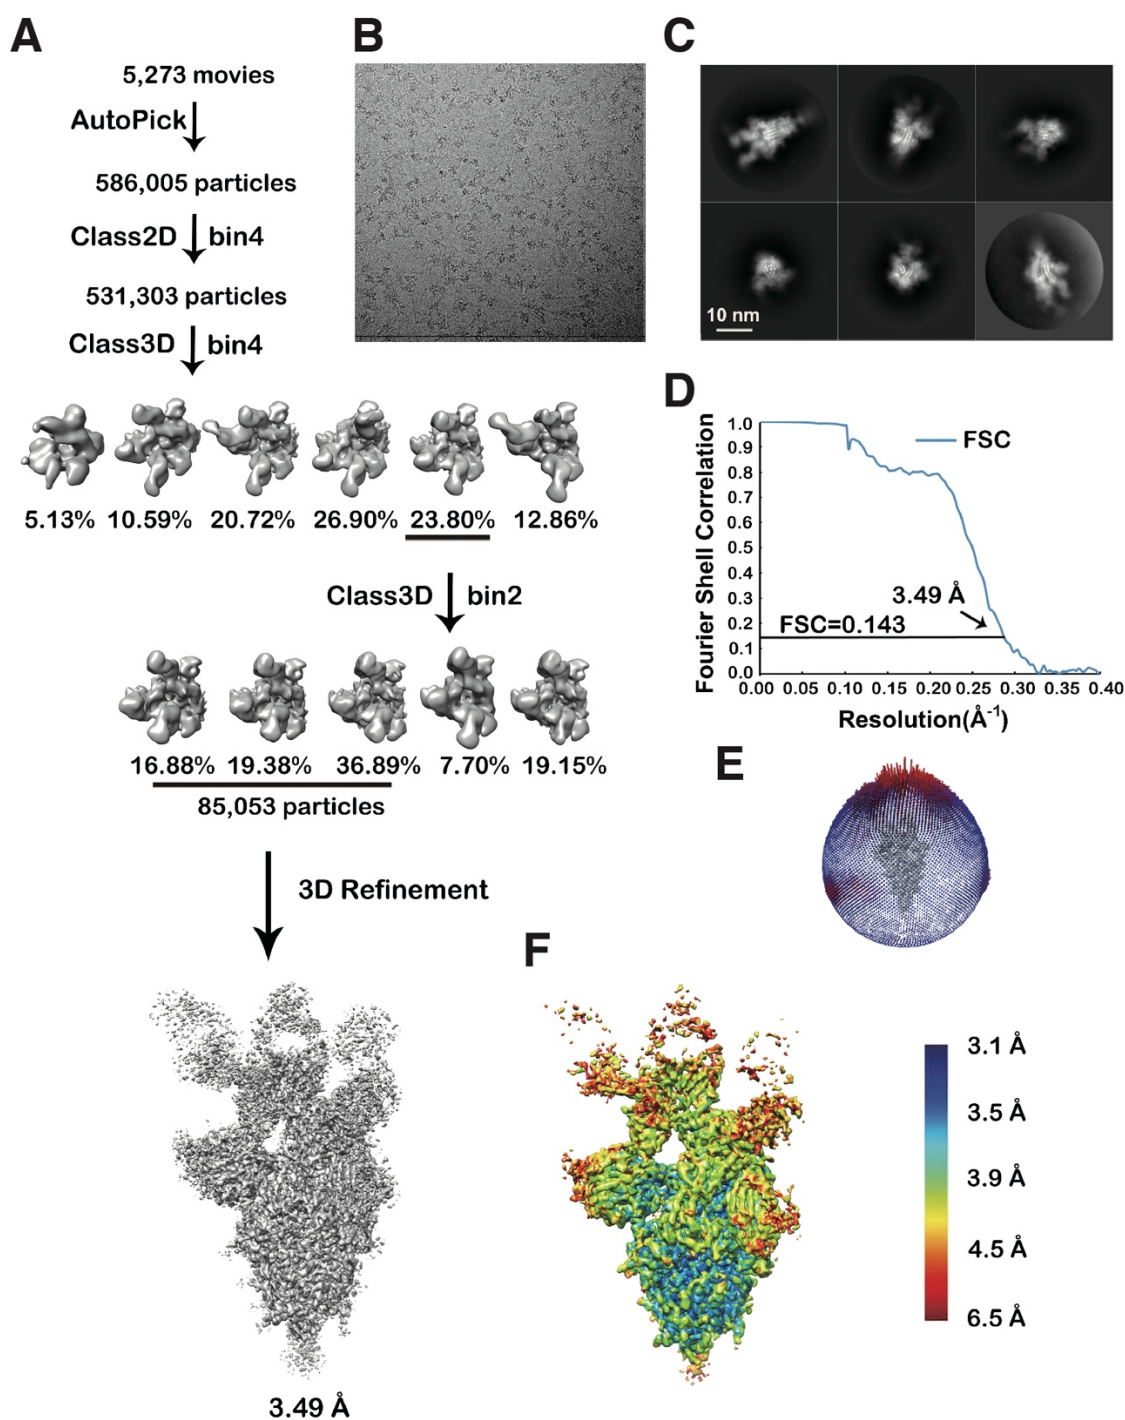

694

695 **Figures S6. Workflow for the 3D reconstruction of the cryo-EM structure of the S-6P trimer in**  
 696 **complex with three BD-368-2 Fabs, Related to Figure 6**

697 (A) Flow chart of image processing.

698 (B) A representative raw image collected using a Titan Krios 300 kV equipped with a K2 detector.

699 (C) Representative 2D classes.

700 (D) Gold standard Fourier shell correlation (FSC) curve with the estimated resolution.

701 (E) Eulerian angle distribution of the particles used in the final 3D reconstruction.

702 (F) Local resolution estimation of the final density map analyzed by ResMap.

703

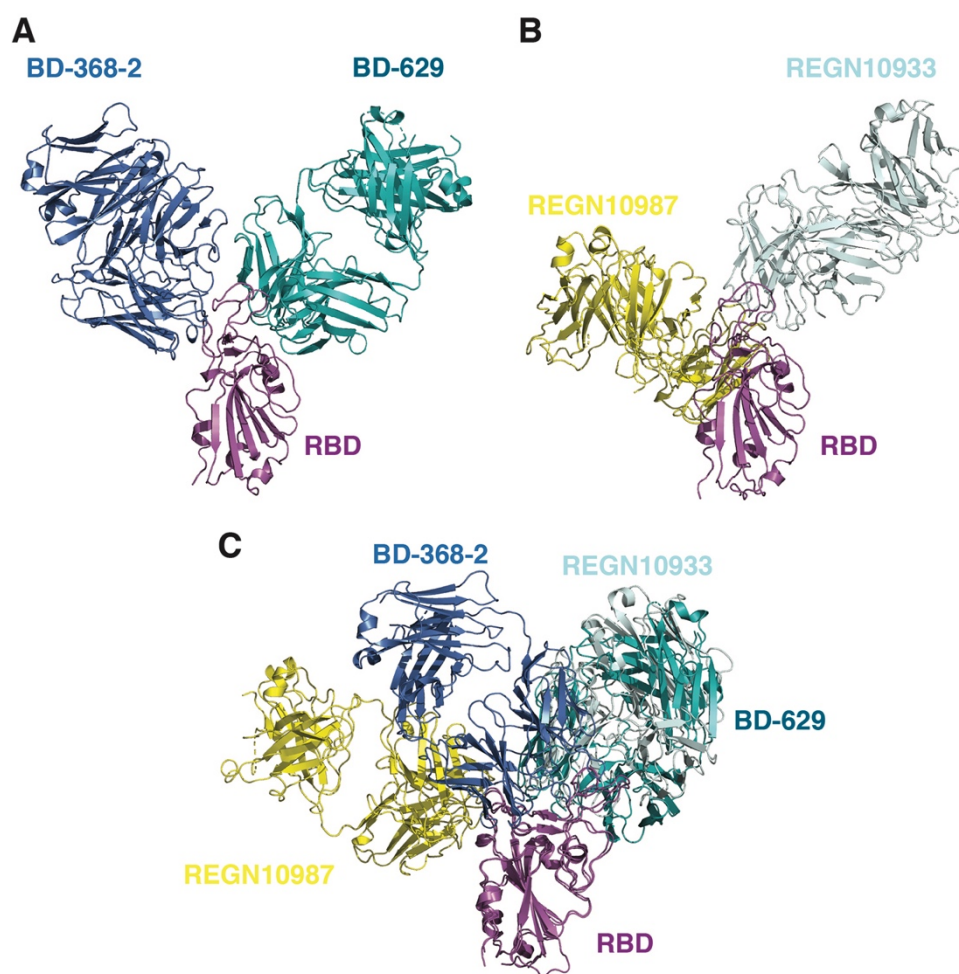

704

705 **Figure S7. Structural comparisons of the BD-368-2/RBD/BD-629 and REGN10987/RBD/REGN10933**  
706 **complexes, Related to Figure 7**

707 (A) Crystal structure of the BD-368-2/RBD/BD-629 complex. BD-368-2, RBD, and BD-629 are shown in  
708 marine, magenta, and teal, respectively.

709 (B) Cryo-EM structure of the REGN10987/RBD/REGN10933 complex (PDB ID: 6XDG). REGN10987,  
710 RBD, and REGN10933 are shown in yellow, magenta, and light blue, respectively.

711 (C) Structural superimposition of the above two complexes.
